# Supplementary material for: Unraveling COVID-19: a large-scale characterization of 4.5 million COVID-19 cases using CHARYBDIS
Source: Research Square preprint supplement (doi:10.21203/rs.3.rs-279400/v1), 2021-03-01
Supplement: Supplementary file [file 9a3d13d617f019ad05c41fb1.pdf]

# Unraveling COVID-19: a large-scale characterization of 4.5 million COVID-19 cases using CHARYBDIS

## SUPPLEMENTAL MATERIAL

Supplementary Table 1. Overview of participating databases mapped to the OMOP-CDM.

| Database name                              | Setting                    | Patient Count (in Millions) | Data History | Data capture process and short database description                                                                                                                                                                                                                                                                                                                                                                                                                                                                                                                                                                                                                                                                                                                                                                                                                                                                                                                                                                                                                    |
|--------------------------------------------|----------------------------|-----------------------------|--------------|------------------------------------------------------------------------------------------------------------------------------------------------------------------------------------------------------------------------------------------------------------------------------------------------------------------------------------------------------------------------------------------------------------------------------------------------------------------------------------------------------------------------------------------------------------------------------------------------------------------------------------------------------------------------------------------------------------------------------------------------------------------------------------------------------------------------------------------------------------------------------------------------------------------------------------------------------------------------------------------------------------------------------------------------------------------------|
| HealthVerity                               | Commercially insured – USA | Not Reported                | Not Reported | HealthVerity derived data set contains de-identified patient information with an antibody and/or diagnostic test for COVID-19 linked to all available Medical Claims and Pharmacy Data from select private data providers participating in the HealthVerity marketplace.                                                                                                                                                                                                                                                                                                                                                                                                                                                                                                                                                                                                                                                                                                                                                                                               |
| Premier                                    | Hospital billing – USA     | Not Reported                | Not Reported | The Premier Healthcare Database contains complete clinical coding, hospital cost, and patient billing data from approximately 700 hospitals throughout the United States representing 20% of inpatient hospital stays. Premier collects data from participating hospitals in its health care alliance. The Premier health care alliance was formed for hospitals to share knowledge, improve patient safety, and reduce risks. Participation in the Premier health care alliance is voluntary. Although the database excludes federally funded hospitals (e.g., Veterans Affairs), the hospitals included are nationally representative based on bed size, geographic region, location (urban/rural) and teaching hospital status. The database contains a date-stamped log of all billed items by cost-accounting department including medications; laboratory, diagnostic, and therapeutic services; and primary and secondary diagnoses for each patient’s hospitalization.                                                                                         |
| Clinical Practice Research Datalink (CPRD) | Primary care – UK          | Not Reported                | Not Reported | The Clinical Practice Research Datalink (CPRD) is a governmental, not-for-profit research service, jointly funded by the NHS National Institute for Health Research (NIHR) and the Medicines and Healthcare products Regulatory Agency (MHRA), a part of the Department of Health, United Kingdom (UK). CPRD consists of data collected from UK primary care for all ages. This includes conditions, observations, measurements, and procedures that the general practitioner is made aware of in addition to any prescriptions as prescribed by the general practitioner. In addition to primary care, there are also linked secondary care records for a small number of people. The major data elements contained within this database are outpatient prescriptions given by the general practitioner (coded with Multilex codes) and outpatient clinical, referral, immunization or test events that the general practitioner knows about (coded in Read or ICD10 or LOINC codes). The database also contains the patients’ year of births and any date of deaths. |

# Unraveling COVID-19: a large-scale characterization of 4.5 million COVID-19 cases using CHARYBDIS

|                                                      |                                 |              |                     |                                                                                                                                                                                                                                                                                                                                                                                                                                                                                                                                                                                                                                                                                                                                                                                                                                                                                                           |
|------------------------------------------------------|---------------------------------|--------------|---------------------|-----------------------------------------------------------------------------------------------------------------------------------------------------------------------------------------------------------------------------------------------------------------------------------------------------------------------------------------------------------------------------------------------------------------------------------------------------------------------------------------------------------------------------------------------------------------------------------------------------------------------------------------------------------------------------------------------------------------------------------------------------------------------------------------------------------------------------------------------------------------------------------------------------------|
| Daegu Catholic University Medical Center             | Hospital EHR – South Korea      | 8,841        | Jan, 2005-Jul, 2020 | A teaching hospital in Daegu, South Korea, covered by Federated E-health Big Data for Evidence Renovation Network (FEEDER-NET). It contains the data from patients in the early days of COVID-19 endemic in South Korea.                                                                                                                                                                                                                                                                                                                                                                                                                                                                                                                                                                                                                                                                                  |
| Hospital del Mar (HMAR)                              | Hospital EHR – Barcelona, Spain | 0.6M         | 2000-Late 2020      | Anonymized data from the Electronic Medical Records from Hospital del Mar (Barcelona, Spain). Hospital belonging to the Spanish National Health System (public), attending the Eastern area of Barcelona City. Includes hospital data collected routinely in the clinical practice, both structured and unstructured information, extracted using a free text analysis tool (with natural language processing): Inpatient (hospital) care, Outpatient specialist care, Emergency Room Visits and partial information from other settings like primary care and pharmacy care present in free text notes from EMRs. All subjects with at least one healthcare encounter with the Hospital within approximately the last 20 years are included (approximately 0.6 M subjects, with more than 5 M hospitalizations/visits). Hospital del Mar data are made available through collaboration with TFS / IOMED. |
| Health Insurance Review & Assessment Service         | Claims – South Korea            | Not Reported | Not Reported        | National claim data from a single insurance service from South Korea. It contains the observational medical records (including both inpatient and outpatient) of a patient while they are qualified to get the national medical insurance.                                                                                                                                                                                                                                                                                                                                                                                                                                                                                                                                                                                                                                                                |
| HM Hospitals                                         | Hospital EHR – Spain            | Not Reported | Not Reported        | Hospital de Madrid (HM) Hospitals data are made available through partnership with IDIAPJGol. The HM Hospitals database covers in-patient care delivered across a network of 17 private hospitals in Spain between 1st of March and 24th of April 2020. HM Hospitals database covers more than 2300 confirmed COVID-19 cases, and all in-patient hospital care, including the data of admission, conditions, procedures and medicines dispensed in hospital, date of discharge, and date of known death or date of end of follow-up in the database.                                                                                                                                                                                                                                                                                                                                                      |
| Nanfang Hospital COVID-19 Research Database (NFHCRD) | Hospital EHR – Hubei, China     | Not Reported | Not Reported        | The clinical data warehouse of The People's Hospital of HongHu, Hubei, China, based on its current and previous electronic health record systems, with data spanning over 4 months and including over 400 patients.                                                                                                                                                                                                                                                                                                                                                                                                                                                                                                                                                                                                                                                                                       |
| Optum EHR                                            | National EHR – USA              | Not Reported | Not Reported        | Optum© de-identified Electronic Health Record Dataset represents Humedica's Electronic Health Record data a medical records database for patients receiving a COVID-19 diagnosis record or lab test for SARS-CoV-2. The medical record data includes clinical information, inclusive of prescriptions as prescribed and administered, lab                                                                                                                                                                                                                                                                                                                                                                                                                                                                                                                                                                 |

# Unraveling COVID-19: a large-scale characterization of 4.5 million COVID-19 cases using CHARYBDIS

results, vital signs, body measurements, diagnoses, procedures, and information derived from clinical Notes using Natural Language Processing (NLP).

|                                                                                          |                                                            |              |                            |                                                                                                                                                                                                                                                                                                                                                                                                                                                                                                                                                                                                                                                                                                            |
|------------------------------------------------------------------------------------------|------------------------------------------------------------|--------------|----------------------------|------------------------------------------------------------------------------------------------------------------------------------------------------------------------------------------------------------------------------------------------------------------------------------------------------------------------------------------------------------------------------------------------------------------------------------------------------------------------------------------------------------------------------------------------------------------------------------------------------------------------------------------------------------------------------------------------------------|
| Information System for Research in Primary Care – Hospitalization Linked Data (SIDIAP-H) | Linked Primary Care EHR to Hospital EHR – Catalonia, Spain | 2M           | Jan 1st 2006-June 6th 2020 | The Information System for Research in Primary Care (SIDIAP; <a href="http://www.sidiap.org">www.sidiap.org</a> ) is a primary care records database from Catalonia, North-East Spain. The SIDIAP-H subset of the database includes around 2 million people out of the total 7 million in SIDIAP that are registered in primary care practices with linked hospital inpatient data available as obtained from the Catalan Institute of Health hospitals. Healthcare is universal and tax-payer funded in the region, and primary care physicians are gatekeepers for all care and responsible for repeat prescriptions.                                                                                    |
| Information System for Research in Primary Care (SIDIAP)                                 | Primary Care EHR - Catalonia, Spain                        | 7.8M         | Jan 1st 2006-June 6th 2020 | The Information System for Research in Primary Care (SIDIAP; <a href="http://www.sidiap.org">www.sidiap.org</a> ) is a primary care records database that covers approximately 7 million people, equivalent to an 80% of the population of Catalonia, North-East Spain. Healthcare is universal and tax-payer funded in the region, and primary care physicians are gatekeepers for all care and responsible for repeat prescriptions.                                                                                                                                                                                                                                                                     |
| STARR-OMOP                                                                               | Hospital EHR – California, USA                             | Not Reported | Not Reported               | STAnford medicine Research data Repository, a clinical data warehouse containing live Epic data from Stanford Health Care, the Stanford Children’s Hospital, the University Healthcare Alliance and Packard Children's Health Alliance clinics and other auxiliary data from Hospital applications such as radiology PACS. STARR platform is developed and operated by Stanford Medicine Research IT team and is made possible by Stanford School of Medicine Research Office. (Datta et al. 2020)                                                                                                                                                                                                         |
| Tufts MC Research Data Warehouse (TRDW)                                                  | Hospital EHR - Massachusetts , USA                         | Not Reported | Not Reported               | Electronic medical record data on approximately 1 million patients who received care beginning in 2006 at Tufts Medical Center (TMC). TMC is an academic medical center that includes Tufts Medical Center's main downtown Boston hospital for adult patients, the Floating Hospital for Children, and associated primary and specialty care clinics. TRDW contains TMC's EHR data fused with data on the same patients from TMC's CoC accredited tumor registry, its oncology EHR, and death data from the Massachusetts State Registry of Vital Statistics. EHR data streams ingested into TRDW include controlled vocabulary data on all domains except cost, and select free text sources and devices. |
| Department of Veterans Affairs (VA OMOP)                                                 | Hospital EHR - USA                                         | Not Reported | Not Reported               | VA OMOP data reflects the national Department of Veterans Affairs health care system, which is the largest integrated provider of medical and mental health services in the United States. Care is provided at 170 VA Medical Centers and 1,063 outpatient sites serving more than 9 million enrolled Veterans each year.                                                                                                                                                                                                                                                                                                                                                                                  |

# Unraveling COVID-19: a large-scale characterization of 4.5 million COVID-19 cases using CHARYBDIS

|                                            |                              |              |                     |                                                                                                                                                                                                                                                                                                                                                                                                                                                                                                                                                  |
|--------------------------------------------|------------------------------|--------------|---------------------|--------------------------------------------------------------------------------------------------------------------------------------------------------------------------------------------------------------------------------------------------------------------------------------------------------------------------------------------------------------------------------------------------------------------------------------------------------------------------------------------------------------------------------------------------|
| Integrated Primary Care Information (IPCI) | Primary Care - Netherlands   | Not Reported | Not Reported        | The Integrated Primary Care Information (IPCI) database is a Dutch database containing the medical records of more than 2.5 million patients provided by more than 600 GPs geographically spread over the Netherlands. In the Netherlands, all citizens are registered with a GP practice which acts as a gatekeeper in a two-way exchange of information with secondary care.                                                                                                                                                                   |
| IQVIA Open Claims                          | Commercial Claims – USA      | >200M        | 2013-October 2020   | A United States database of open, pre-adjudicated claims from January 2013 to May 2020. Data are reported at anonymized patient level collected from office-based physicians and specialists via office management software and clearinghouse switch sources for the purpose of reimbursement. A subset of medical claims data have adjudicated claims.                                                                                                                                                                                          |
| Columbia University Irving Medical Center  | Hospital EHR – New York, USA |              |                     | The clinical data warehouse of NewYork-Presbyterian Hospital/Columbia University Irving Medical Center, New York, NY, based on its current and previous electronic health record systems, with data spanning over 30 years and including over 6 million patients                                                                                                                                                                                                                                                                                 |
| IQVIA Longitudinal Patient Data France     | Primary Care – France        | 7.8M         | 1994-June 2020      | IQVIA LPD France is a computerised network of physicians including GPs who contribute to a centralised database of anonymised patient EMR. Currently, >1200 GPs from 400 practices are contributing to the database covering 7.8M patients in France. The database covers a time period from 1994 through the present. Observation time is defined by the first and last consultation dates. Drug information is derived from GP prescriptions. Drugs obtained over the counter by the patient outside the prescription system are not reported. |
| IQVIA Longitudinal Patient Data Italy      | Primary Care – Italy         | 2M           | 2004-July 2020      | LPD Italy is comprised of anonymised patient records collected from software used by GPs during an office visit to document patients' clinical records. Data coverage includes over 2M patient records with at least one visit and 119.5M prescription orders across 900 GP practices. Dates of service include from 2004 through present. Observation time is defined by the first and last consultation dates. Drugs are captured as prescription records with product                                                                         |
| IQVIA Disease Analyser Germany             | Primary Care – Germany       | 34M          | 1992-September 2020 | IQVIA LPD DA Germany is collected from extracts of patient management software used by GPs and specialists practicing in ambulatory care settings. Data coverage includes more than 34M distinct person records out of a total population of 80M (42.5%) in the country and collected from 2,734 providers. Dates of service include from 1992 through September 2020.                                                                                                                                                                           |
| Oregon Health & Science University         | Hospital EHR – Oregon, USA   | 3M           | 2010 – January 2021 | Oregon Health & Science University's Research Data Warehouse that contains over 3 million patients over more than 10 years; the Oregon Clinical & Translational Research Institute.                                                                                                                                                                                                                                                                                                                                                              |

# Unraveling COVID-19: a large-scale characterization of 4.5 million COVID-19 cases using CHARYBDIS

|                                              |                                |    |                |                                                                                                                                                                                                                                                                                                                                                                                                                                                                                                                                  |
|----------------------------------------------|--------------------------------|----|----------------|----------------------------------------------------------------------------------------------------------------------------------------------------------------------------------------------------------------------------------------------------------------------------------------------------------------------------------------------------------------------------------------------------------------------------------------------------------------------------------------------------------------------------------|
| UW Medicine COVID Research Dataset (UWM-CRD) | Hospital EHR – Washington, USA | 5M | 2010-Late 2020 | The dataset includes UW Medicine patients who have been tested for COVID-19 that have information within the UW Medicine Electronic Health Record. The dataset is a subgroup of the non-OMOP clinical data warehouse of University of Washington Medical Center, comprised of Harborview Medical Center, UW Medical Center - Montlake, and UW Medical Center - Northwest in Seattle WA, and is based on its current electronic health record systems, with data spanning over 10 years and including roughly 5 million patients. |
|----------------------------------------------|--------------------------------|----|----------------|----------------------------------------------------------------------------------------------------------------------------------------------------------------------------------------------------------------------------------------------------------------------------------------------------------------------------------------------------------------------------------------------------------------------------------------------------------------------------------------------------------------------------------|

# Unraveling COVID-19: a large-scale characterization of 4.5 million COVID-19 cases using CHARYBDIS

**Supplementary Figure 1. Distribution of diagnosed, hospitalized and requiring intensive services COVID-19 cases by age and sex across the OHDSI COVID-19 network.**

**NB:** In each subplot, the x-axis represents what proportion of all women (left) and all men (right) fall in each age category. No prior observation period required in the cohorts shown in this figure. Cohorts must be  $\geq 140$  people to be reported in this analysis. Abbreviations: diag: diagnosed; hosp: hospitalized; i.s.: hospitalized and requiring intensive services.

**A. Europe**

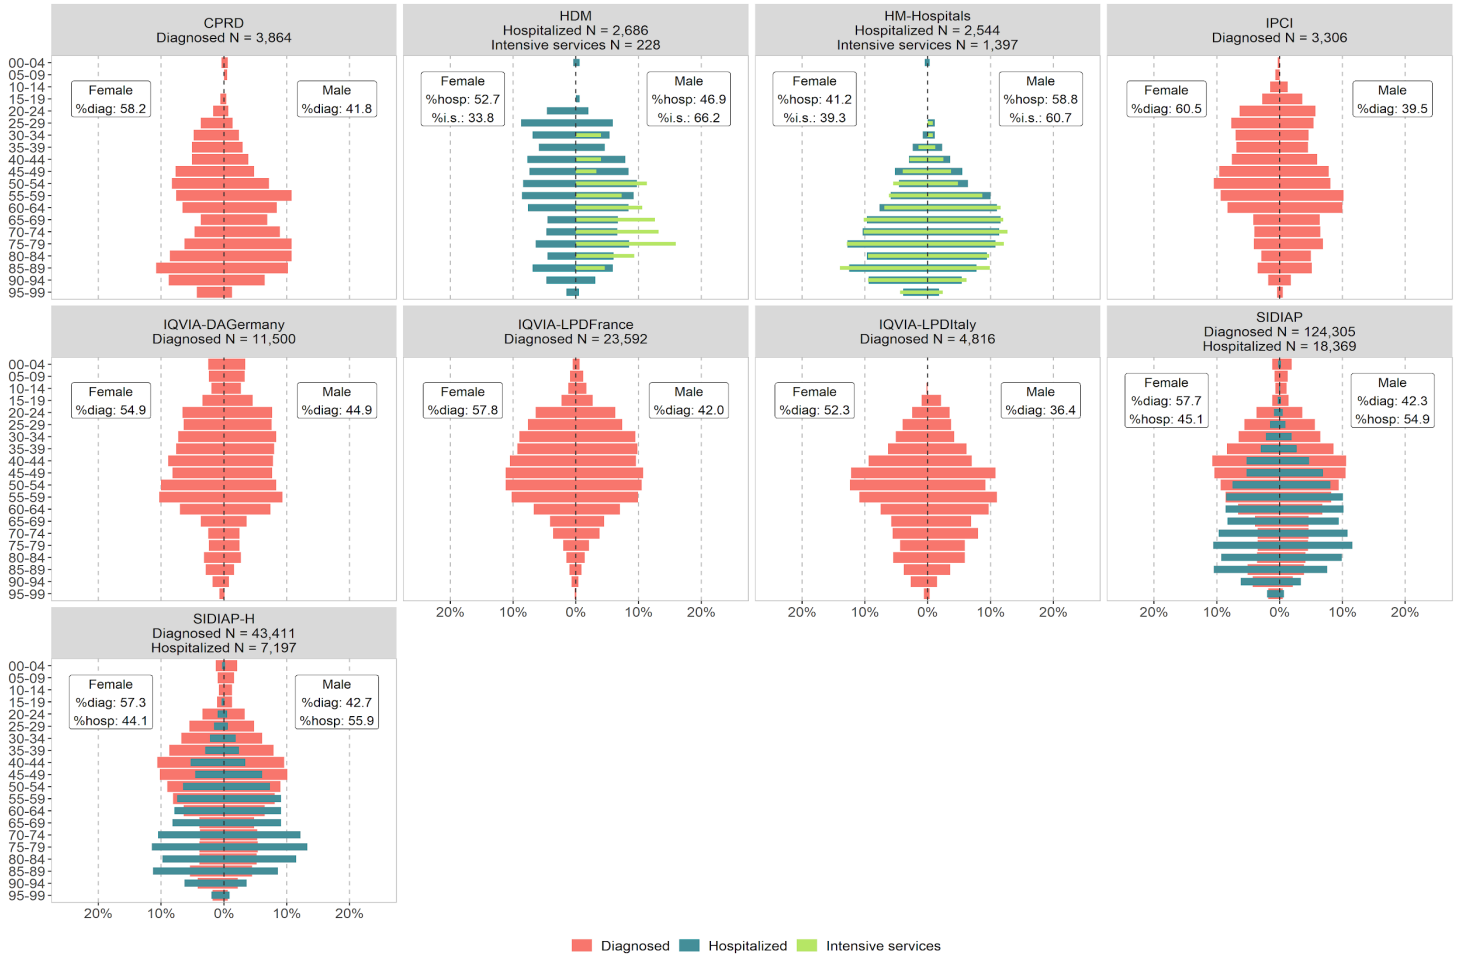

Abbreviations: CPRD: Clinical Practice Research Datalink – Outpatient Setting; HDM/HMAR: Hospital del Mar – Inpatient Setting; HM Hospitals – Inpatient Setting; IPCI: Integrated Primary Care Information – Outpatient Setting; IQVIA

# Unraveling COVID-19: a large-scale characterization of 4.5 million COVID-19 cases using CHARYBDIS

Disease Analyser Germany -Outpatient Setting; IQVA Longitudinal Patient Data France – Outpatient Setting; IQVIA Longitudinal Patient Data Italy – Outpatient Setting; SIDIAP: Information System for Research in Primary Care – Outpatient Setting; SIDIAP-H: Information System for Research in Primary Care with Hospital Linkage

## B. Asia

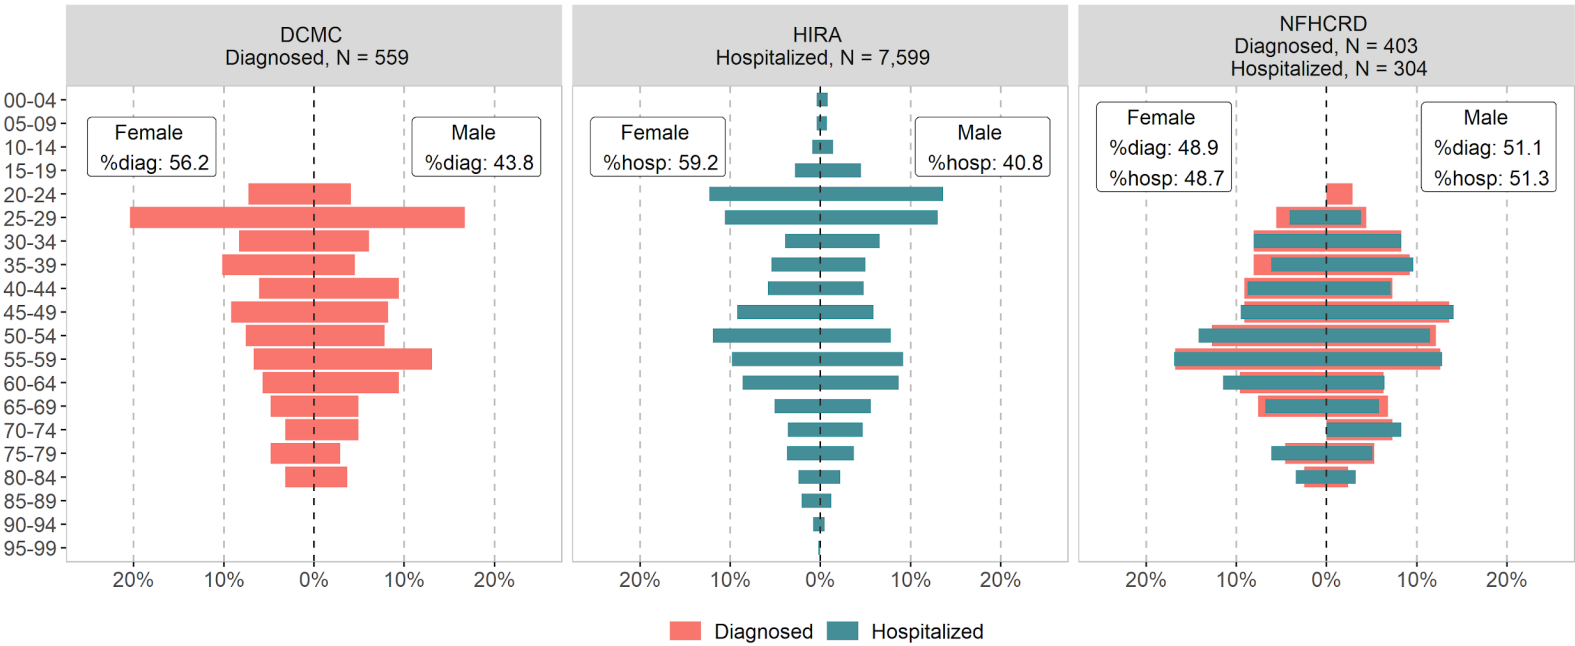

Abbreviations: DCMC: Daegu Catholic University Medical Center (South Korea) – Outpatient Setting; HIRA: Health Insurance Review & Assessment Service (South Korea) – Inpatient Setting; NFHCRD: Nanfang Hospital COVID-19 Research Database (NFHCRD) – Inpatient/Outpatient Setting

# Unraveling COVID-19: a large-scale characterization of 4.5 million COVID-19 cases using CHARYBDIS

Supplementary Table 2. Cohort definitions

**How to access:** atlas.ohdsi.org requires you to log into a G-Suite affiliated account to see the library of Cohort Definitions. To access the Definition URL, click on the link and proceed to Log-In (upper right corner). The Log-In can be any G-Suite affiliated account. When you are finished, it will bring you back to the ATLAS home page. You can then click on the Definition URL again and it should allow you to see the contents of that definition.

| Cohort name                                                                                       | Definition URL                                                                                                                                                                                                                    |
|---------------------------------------------------------------------------------------------------|-----------------------------------------------------------------------------------------------------------------------------------------------------------------------------------------------------------------------------------|
| Abortion                                                                                          | <a href="https://atlas.ohdsi.org/#/cohortdefinition/263">https://atlas.ohdsi.org/#/cohortdefinition/263</a>                                                                                                                       |
| Acute kidney injury (AKI) diagnosis during hospitalization                                        | <a href="https://atlas.ohdsi.org/#/cohortdefinition/276">https://atlas.ohdsi.org/#/cohortdefinition/276</a>                                                                                                                       |
| Acute kidney injury (AKI) using diagnosis codes and change in measurements during hospitalization | <a href="https://github.com/ohdsi-studies/Covid19CharacterizationCharybdis/tree/master/inst/sql/sql_server/201.sql">https://github.com/ohdsi-studies/Covid19CharacterizationCharybdis/tree/master/inst/sql/sql_server/201.sql</a> |
| Acute myocardial infarction events                                                                | <a href="https://atlas.ohdsi.org/#/cohortdefinition/239">https://atlas.ohdsi.org/#/cohortdefinition/239</a>                                                                                                                       |
| Acute pancreatitis events                                                                         | <a href="https://atlas.ohdsi.org/#/cohortdefinition/247">https://atlas.ohdsi.org/#/cohortdefinition/247</a>                                                                                                                       |
| Acute Respiratory Distress syndrome (ARDS) during hospitalization                                 | <a href="https://atlas.ohdsi.org/#/cohortdefinition/278">https://atlas.ohdsi.org/#/cohortdefinition/278</a>                                                                                                                       |
| Angina during hospitalization                                                                     | <a href="https://atlas.ohdsi.org/#/cohortdefinition/250">https://atlas.ohdsi.org/#/cohortdefinition/250</a>                                                                                                                       |
| Anosmia OR Hyposmia OR Dysgeusia                                                                  | <a href="https://atlas.ohdsi.org/#/cohortdefinition/283">https://atlas.ohdsi.org/#/cohortdefinition/283</a>                                                                                                                       |
| Asthma/COPD Step 1                                                                                | <a href="https://atlas.ohdsi.org/#/cohortdefinition/216">https://atlas.ohdsi.org/#/cohortdefinition/216</a>                                                                                                                       |
| Asthma/COPD Step 2                                                                                | <a href="https://atlas.ohdsi.org/#/cohortdefinition/215">https://atlas.ohdsi.org/#/cohortdefinition/215</a>                                                                                                                       |
| Asthma/COPD Step 3                                                                                | <a href="https://atlas.ohdsi.org/#/cohortdefinition/214">https://atlas.ohdsi.org/#/cohortdefinition/214</a>                                                                                                                       |
| Bleeding during hospitalization                                                                   | <a href="https://atlas.ohdsi.org/#/cohortdefinition/238">https://atlas.ohdsi.org/#/cohortdefinition/238</a>                                                                                                                       |
| Bradycardia or heart block during hospitalization                                                 | <a href="https://atlas.ohdsi.org/#/cohortdefinition/271">https://atlas.ohdsi.org/#/cohortdefinition/271</a>                                                                                                                       |
| Cardiac arrhythmia during hospitalization                                                         | <a href="https://atlas.ohdsi.org/#/cohortdefinition/248">https://atlas.ohdsi.org/#/cohortdefinition/248</a>                                                                                                                       |
| Cardiovascular-related mortality                                                                  | <a href="https://atlas.ohdsi.org/#/cohortdefinition/244">https://atlas.ohdsi.org/#/cohortdefinition/244</a>                                                                                                                       |
| Cesarean section                                                                                  | <a href="https://atlas.ohdsi.org/#/cohortdefinition/260">https://atlas.ohdsi.org/#/cohortdefinition/260</a>                                                                                                                       |
| Cough                                                                                             | <a href="https://atlas.ohdsi.org/#/cohortdefinition/287">https://atlas.ohdsi.org/#/cohortdefinition/287</a>                                                                                                                       |
| Death                                                                                             | <a href="https://atlas.ohdsi.org/#/cohortdefinition/96">https://atlas.ohdsi.org/#/cohortdefinition/96</a>                                                                                                                         |
| Deep vein thrombosis events                                                                       | <a href="https://atlas.ohdsi.org/#/cohortdefinition/273">https://atlas.ohdsi.org/#/cohortdefinition/273</a>                                                                                                                       |
| dialysis during hospitalization                                                                   | <a href="https://atlas.ohdsi.org/#/cohortdefinition/252">https://atlas.ohdsi.org/#/cohortdefinition/252</a>                                                                                                                       |
| Discharge from hospitalization                                                                    | <a href="https://github.com/ohdsi-studies/Covid19CharacterizationCharybdis/tree/master/inst/sql/sql_server/202.sql">https://github.com/ohdsi-studies/Covid19CharacterizationCharybdis/tree/master/inst/sql/sql_server/202.sql</a> |
| Dyspnea                                                                                           | <a href="https://atlas.ohdsi.org/#/cohortdefinition/284">https://atlas.ohdsi.org/#/cohortdefinition/284</a>                                                                                                                       |
| Eclampsia and pre-eclampsia                                                                       | <a href="https://atlas.ohdsi.org/#/cohortdefinition/289">https://atlas.ohdsi.org/#/cohortdefinition/289</a>                                                                                                                       |



# Unraveling COVID-19: a large-scale characterization of 4.5 million COVID-19 cases using CHARYBDIS

|                                                                                                                                                           |                                                                                                             |
|-----------------------------------------------------------------------------------------------------------------------------------------------------------|-------------------------------------------------------------------------------------------------------------|
| ECMO during hospitalization                                                                                                                               | <a href="https://atlas.ohdsi.org/#/cohortdefinition/253">https://atlas.ohdsi.org/#/cohortdefinition/253</a> |
| Fetal growth restriction                                                                                                                                  | <a href="https://atlas.ohdsi.org/#/cohortdefinition/261">https://atlas.ohdsi.org/#/cohortdefinition/261</a> |
| Fever                                                                                                                                                     | <a href="https://atlas.ohdsi.org/#/cohortdefinition/288">https://atlas.ohdsi.org/#/cohortdefinition/288</a> |
| Flu-like symptom episodes                                                                                                                                 | <a href="https://atlas.ohdsi.org/#/cohortdefinition/290">https://atlas.ohdsi.org/#/cohortdefinition/290</a> |
| Gastrointestinal bleeding events                                                                                                                          | <a href="https://atlas.ohdsi.org/#/cohortdefinition/245">https://atlas.ohdsi.org/#/cohortdefinition/245</a> |
| Gestational diabetes                                                                                                                                      | <a href="https://atlas.ohdsi.org/#/cohortdefinition/225">https://atlas.ohdsi.org/#/cohortdefinition/225</a> |
| Heart failure during hospitalization                                                                                                                      | <a href="https://atlas.ohdsi.org/#/cohortdefinition/272">https://atlas.ohdsi.org/#/cohortdefinition/272</a> |
| Hemorrhagic stroke (intracerebral bleeding) events                                                                                                        | <a href="https://atlas.ohdsi.org/#/cohortdefinition/240">https://atlas.ohdsi.org/#/cohortdefinition/240</a> |
| Hospitalization episodes                                                                                                                                  | <a href="https://atlas.ohdsi.org/#/cohortdefinition/280">https://atlas.ohdsi.org/#/cohortdefinition/280</a> |
| Hospitalization for Asthma                                                                                                                                | <a href="https://atlas.ohdsi.org/#/cohortdefinition/259">https://atlas.ohdsi.org/#/cohortdefinition/259</a> |
| Hospitalization for COPD                                                                                                                                  | <a href="https://atlas.ohdsi.org/#/cohortdefinition/258">https://atlas.ohdsi.org/#/cohortdefinition/258</a> |
| Hospitalization for psychosis                                                                                                                             | <a href="https://atlas.ohdsi.org/#/cohortdefinition/236">https://atlas.ohdsi.org/#/cohortdefinition/236</a> |
| Incident depression with no prior treatment and no mania/psychoses                                                                                        | <a href="https://atlas.ohdsi.org/#/cohortdefinition/237">https://atlas.ohdsi.org/#/cohortdefinition/237</a> |
| intensive services during hospitalization                                                                                                                 | <a href="https://atlas.ohdsi.org/#/cohortdefinition/316">https://atlas.ohdsi.org/#/cohortdefinition/316</a> |
| Ischemic stroke events                                                                                                                                    | <a href="https://atlas.ohdsi.org/#/cohortdefinition/241">https://atlas.ohdsi.org/#/cohortdefinition/241</a> |
| Livebirth Delivery                                                                                                                                        | <a href="https://atlas.ohdsi.org/#/cohortdefinition/267">https://atlas.ohdsi.org/#/cohortdefinition/267</a> |
| Livebirth excluding preterm and post term delivery                                                                                                        | <a href="https://atlas.ohdsi.org/#/cohortdefinition/266">https://atlas.ohdsi.org/#/cohortdefinition/266</a> |
| Livebirth Post term Delivery                                                                                                                              | <a href="https://atlas.ohdsi.org/#/cohortdefinition/265">https://atlas.ohdsi.org/#/cohortdefinition/265</a> |
| Livebirth Preterm Delivery                                                                                                                                | <a href="https://atlas.ohdsi.org/#/cohortdefinition/264">https://atlas.ohdsi.org/#/cohortdefinition/264</a> |
| Malaise or fatigue                                                                                                                                        | <a href="https://atlas.ohdsi.org/#/cohortdefinition/285">https://atlas.ohdsi.org/#/cohortdefinition/285</a> |
| mechanical ventilation during hospitalization                                                                                                             | <a href="https://atlas.ohdsi.org/#/cohortdefinition/318">https://atlas.ohdsi.org/#/cohortdefinition/318</a> |
| Multi-system inflammatory syndrome (Kawasaki disease or toxic shock syndrome)                                                                             | <a href="https://atlas.ohdsi.org/#/cohortdefinition/234">https://atlas.ohdsi.org/#/cohortdefinition/234</a> |
| Myalgia                                                                                                                                                   | <a href="https://atlas.ohdsi.org/#/cohortdefinition/286">https://atlas.ohdsi.org/#/cohortdefinition/286</a> |
| Persons hospitalized and requiring intensive services with a COVID-19 diagnosis record or a SARS-CoV-2 positive test with at least 365d prior observation | <a href="https://atlas.ohdsi.org/#/cohortdefinition/305">https://atlas.ohdsi.org/#/cohortdefinition/305</a> |
| Persons hospitalized and requiring intensive services with a COVID-19 diagnosis record or a SARS-CoV-2 positive test with no required prior observation   | <a href="https://atlas.ohdsi.org/#/cohortdefinition/308">https://atlas.ohdsi.org/#/cohortdefinition/308</a> |
| Persons hospitalized and requiring intensive services with a SARS-CoV-2 positive test with at least 365d prior observation                                | <a href="https://atlas.ohdsi.org/#/cohortdefinition/306">https://atlas.ohdsi.org/#/cohortdefinition/306</a> |

# Unraveling COVID-19: a large-scale characterization of 4.5 million COVID-19 cases using CHARYBDIS

|                                                                                                                          |                                                                                                             |
|--------------------------------------------------------------------------------------------------------------------------|-------------------------------------------------------------------------------------------------------------|
| Persons hospitalized and requiring intensive services with a SARS-CoV-2 positive test with no required prior observation | <a href="https://atlas.ohdsi.org/#/cohortdefinition/309">https://atlas.ohdsi.org/#/cohortdefinition/309</a> |
| Persons hospitalized with a COVID-19 diagnosis record or a SARS-CoV-2 positive test with at least 365d prior observation | <a href="https://atlas.ohdsi.org/#/cohortdefinition/197">https://atlas.ohdsi.org/#/cohortdefinition/197</a> |
| Persons hospitalized with a COVID-19 diagnosis record or a SARS-CoV-2 positive test with no required prior observation   | <a href="https://atlas.ohdsi.org/#/cohortdefinition/198">https://atlas.ohdsi.org/#/cohortdefinition/198</a> |
| Persons hospitalized with a SARS-CoV-2 positive test with at least 365d prior observation                                | <a href="https://atlas.ohdsi.org/#/cohortdefinition/191">https://atlas.ohdsi.org/#/cohortdefinition/191</a> |
| Persons hospitalized with a SARS-CoV-2 positive test with no required prior observation                                  | <a href="https://atlas.ohdsi.org/#/cohortdefinition/194">https://atlas.ohdsi.org/#/cohortdefinition/194</a> |
| Persons tested for SARS-CoV-2 with at least 365d prior observation                                                       | <a href="https://atlas.ohdsi.org/#/cohortdefinition/206">https://atlas.ohdsi.org/#/cohortdefinition/206</a> |
| Persons tested for SARS-CoV-2 with no required prior observation                                                         | <a href="https://atlas.ohdsi.org/#/cohortdefinition/205">https://atlas.ohdsi.org/#/cohortdefinition/205</a> |
| Persons tested positive for SARS-CoV-2 with at least 365d prior observation                                              | <a href="https://atlas.ohdsi.org/#/cohortdefinition/204">https://atlas.ohdsi.org/#/cohortdefinition/204</a> |
| Persons tested positive for SARS-CoV-2 with no required prior observation                                                | <a href="https://atlas.ohdsi.org/#/cohortdefinition/203">https://atlas.ohdsi.org/#/cohortdefinition/203</a> |
| Persons tested with a COVID-19 diagnosis record or a SARS-CoV-2 positive test with at least 365d prior observation       | <a href="https://atlas.ohdsi.org/#/cohortdefinition/202">https://atlas.ohdsi.org/#/cohortdefinition/202</a> |
| Persons tested with a COVID-19 diagnosis record or a SARS-CoV-2 positive test with no required prior observation         | <a href="https://atlas.ohdsi.org/#/cohortdefinition/201">https://atlas.ohdsi.org/#/cohortdefinition/201</a> |
| Persons with a COVID-19 diagnosis or a SARS-CoV-2 positive test with at least 365d prior observation                     | <a href="https://atlas.ohdsi.org/#/cohortdefinition/200">https://atlas.ohdsi.org/#/cohortdefinition/200</a> |
| Persons with a COVID-19 diagnosis or a SARS-CoV-2 positive test with no required prior observation                       | <a href="https://atlas.ohdsi.org/#/cohortdefinition/199">https://atlas.ohdsi.org/#/cohortdefinition/199</a> |
| Persons with additional testing for SARS-Cov-2 (prior test >=1d before test)                                             | <a href="https://atlas.ohdsi.org/#/cohortdefinition/282">https://atlas.ohdsi.org/#/cohortdefinition/282</a> |
| Persons with additional testing for SARS-Cov-2 (prior test >=5d before test)                                             | <a href="https://atlas.ohdsi.org/#/cohortdefinition/281">https://atlas.ohdsi.org/#/cohortdefinition/281</a> |
| Persons with chest pain or angina                                                                                        | <a href="https://atlas.ohdsi.org/#/cohortdefinition/251">https://atlas.ohdsi.org/#/cohortdefinition/251</a> |
| Persons with hepatic failure                                                                                             | <a href="https://atlas.ohdsi.org/#/cohortdefinition/249">https://atlas.ohdsi.org/#/cohortdefinition/249</a> |
| Pneumonia during hospitalization                                                                                         | <a href="https://atlas.ohdsi.org/#/cohortdefinition/279">https://atlas.ohdsi.org/#/cohortdefinition/279</a> |
| Pneumonia episodes                                                                                                       | <a href="https://atlas.ohdsi.org/#/cohortdefinition/257">https://atlas.ohdsi.org/#/cohortdefinition/257</a> |
| Pregnant women                                                                                                           | <a href="https://atlas.ohdsi.org/#/cohortdefinition/233">https://atlas.ohdsi.org/#/cohortdefinition/233</a> |
| Premature Rupture of Membranes                                                                                           | <a href="https://atlas.ohdsi.org/#/cohortdefinition/262">https://atlas.ohdsi.org/#/cohortdefinition/262</a> |
| Prevalent Asthma or Chronic obstructive pulmonary disease (COPD)                                                         | <a href="https://atlas.ohdsi.org/#/cohortdefinition/217">https://atlas.ohdsi.org/#/cohortdefinition/217</a> |
| Prevalent Asthma without COPD                                                                                            | <a href="https://atlas.ohdsi.org/#/cohortdefinition/218">https://atlas.ohdsi.org/#/cohortdefinition/218</a> |
| Prevalent Autoimmune condition                                                                                           | <a href="https://atlas.ohdsi.org/#/cohortdefinition/220">https://atlas.ohdsi.org/#/cohortdefinition/220</a> |

# Unraveling COVID-19: a large-scale characterization of 4.5 million COVID-19 cases using CHARYBDIS

|                                                                                                                                    |                                                                                                             |
|------------------------------------------------------------------------------------------------------------------------------------|-------------------------------------------------------------------------------------------------------------|
| Prevalent chronic kidney disease                                                                                                   | <a href="https://atlas.ohdsi.org/#/cohortdefinition/228">https://atlas.ohdsi.org/#/cohortdefinition/228</a> |
| Prevalent chronic kidney disease broad                                                                                             | <a href="https://atlas.ohdsi.org/#/cohortdefinition/312">https://atlas.ohdsi.org/#/cohortdefinition/312</a> |
| Prevalent chronic obstructive pulmonary disease (COPD) without asthma                                                              | <a href="https://atlas.ohdsi.org/#/cohortdefinition/219">https://atlas.ohdsi.org/#/cohortdefinition/219</a> |
| Prevalent Dementia                                                                                                                 | <a href="https://atlas.ohdsi.org/#/cohortdefinition/226">https://atlas.ohdsi.org/#/cohortdefinition/226</a> |
| Prevalent end stage renal disease                                                                                                  | <a href="https://atlas.ohdsi.org/#/cohortdefinition/232">https://atlas.ohdsi.org/#/cohortdefinition/232</a> |
| Prevalent end stage renal disease broad                                                                                            | <a href="https://atlas.ohdsi.org/#/cohortdefinition/313">https://atlas.ohdsi.org/#/cohortdefinition/313</a> |
| Prevalent heart disease                                                                                                            | <a href="https://atlas.ohdsi.org/#/cohortdefinition/231">https://atlas.ohdsi.org/#/cohortdefinition/231</a> |
| Prevalent Hepatitis C                                                                                                              | <a href="https://atlas.ohdsi.org/#/cohortdefinition/230">https://atlas.ohdsi.org/#/cohortdefinition/230</a> |
| Prevalent Human immunodeficiency virus infection                                                                                   | <a href="https://atlas.ohdsi.org/#/cohortdefinition/229">https://atlas.ohdsi.org/#/cohortdefinition/229</a> |
| Prevalent Human immunodeficiency virus infection broad                                                                             | <a href="https://atlas.ohdsi.org/#/cohortdefinition/314">https://atlas.ohdsi.org/#/cohortdefinition/314</a> |
| Prevalent hypertension                                                                                                             | <a href="https://atlas.ohdsi.org/#/cohortdefinition/227">https://atlas.ohdsi.org/#/cohortdefinition/227</a> |
| Prevalent malignant neoplasm excluding non-melanoma skin cancer (note: referred to as “Prior cancer” in tables for space purposes) | <a href="https://atlas.ohdsi.org/#/cohortdefinition/222">https://atlas.ohdsi.org/#/cohortdefinition/222</a> |
| Prevalent obesity                                                                                                                  | <a href="https://atlas.ohdsi.org/#/cohortdefinition/224">https://atlas.ohdsi.org/#/cohortdefinition/224</a> |
| Prevalent pre-existing condition of COVID risk factor                                                                              | <a href="https://atlas.ohdsi.org/#/cohortdefinition/213">https://atlas.ohdsi.org/#/cohortdefinition/213</a> |
| Prevalent tuberculosis                                                                                                             | <a href="https://atlas.ohdsi.org/#/cohortdefinition/221">https://atlas.ohdsi.org/#/cohortdefinition/221</a> |
| Prevalent tuberculosis broad                                                                                                       | <a href="https://atlas.ohdsi.org/#/cohortdefinition/315">https://atlas.ohdsi.org/#/cohortdefinition/315</a> |
| Prevalent Type 2 Diabetes Mellitus                                                                                                 | <a href="https://atlas.ohdsi.org/#/cohortdefinition/311">https://atlas.ohdsi.org/#/cohortdefinition/311</a> |
| Pulmonary Embolism events                                                                                                          | <a href="https://atlas.ohdsi.org/#/cohortdefinition/274">https://atlas.ohdsi.org/#/cohortdefinition/274</a> |
| Sepsis during hospitalization                                                                                                      | <a href="https://atlas.ohdsi.org/#/cohortdefinition/277">https://atlas.ohdsi.org/#/cohortdefinition/277</a> |
| Stillbirth                                                                                                                         | <a href="https://atlas.ohdsi.org/#/cohortdefinition/268">https://atlas.ohdsi.org/#/cohortdefinition/268</a> |
| Stroke (ischemic or hemorrhagic) events                                                                                            | <a href="https://atlas.ohdsi.org/#/cohortdefinition/242">https://atlas.ohdsi.org/#/cohortdefinition/242</a> |
| Suicide and suicidal ideation                                                                                                      | <a href="https://atlas.ohdsi.org/#/cohortdefinition/235">https://atlas.ohdsi.org/#/cohortdefinition/235</a> |
| Supraventricular arrhythmia during hospitalization                                                                                 | <a href="https://atlas.ohdsi.org/#/cohortdefinition/270">https://atlas.ohdsi.org/#/cohortdefinition/270</a> |
| Total cardiovascular disease events                                                                                                | <a href="https://atlas.ohdsi.org/#/cohortdefinition/246">https://atlas.ohdsi.org/#/cohortdefinition/246</a> |
| tracheostomy during hospitalization                                                                                                | <a href="https://atlas.ohdsi.org/#/cohortdefinition/317">https://atlas.ohdsi.org/#/cohortdefinition/317</a> |
| Transient ischemic attack events                                                                                                   | <a href="https://atlas.ohdsi.org/#/cohortdefinition/243">https://atlas.ohdsi.org/#/cohortdefinition/243</a> |
| Venous thromboembolic (pulmonary embolism and deep vein thrombosis) events                                                         | <a href="https://atlas.ohdsi.org/#/cohortdefinition/275">https://atlas.ohdsi.org/#/cohortdefinition/275</a> |
| ventricular arrhythmia or cardiac arrest during hospitalization                                                                    | <a href="https://atlas.ohdsi.org/#/cohortdefinition/269">https://atlas.ohdsi.org/#/cohortdefinition/269</a> |

# Unraveling COVID-19: a large-scale characterization of 4.5 million COVID-19 cases using CHARYBDIS

**Supplementary Figure 3. Standardized mean difference in conditions (A) and medication use (B) among patients diagnosed compared to patients hospitalized with COVID-19.**

Individuals diagnosed compared with those hospitalized with COVID-19. Only databases with individuals in both cohorts and with at least 1 year of prior observation period were included. Conditions and medications from up to a year prior to the index date. Each dot represents one of these covariates with the colour indicating the type of condition/medication and the size of the dot reflecting the prevalence of the variable in the COVID-19 study populations.

# Unraveling COVID-19: a large-scale characterization of 4.5 million COVID-19 cases using CHARYBDIS

## A. Conditions by Database

Baseline characteristics of Persons diagnosed with COVID-19 or tested positive compared to Persons hospitalized with COVID-19 or tested positive (in -365d to -1d)

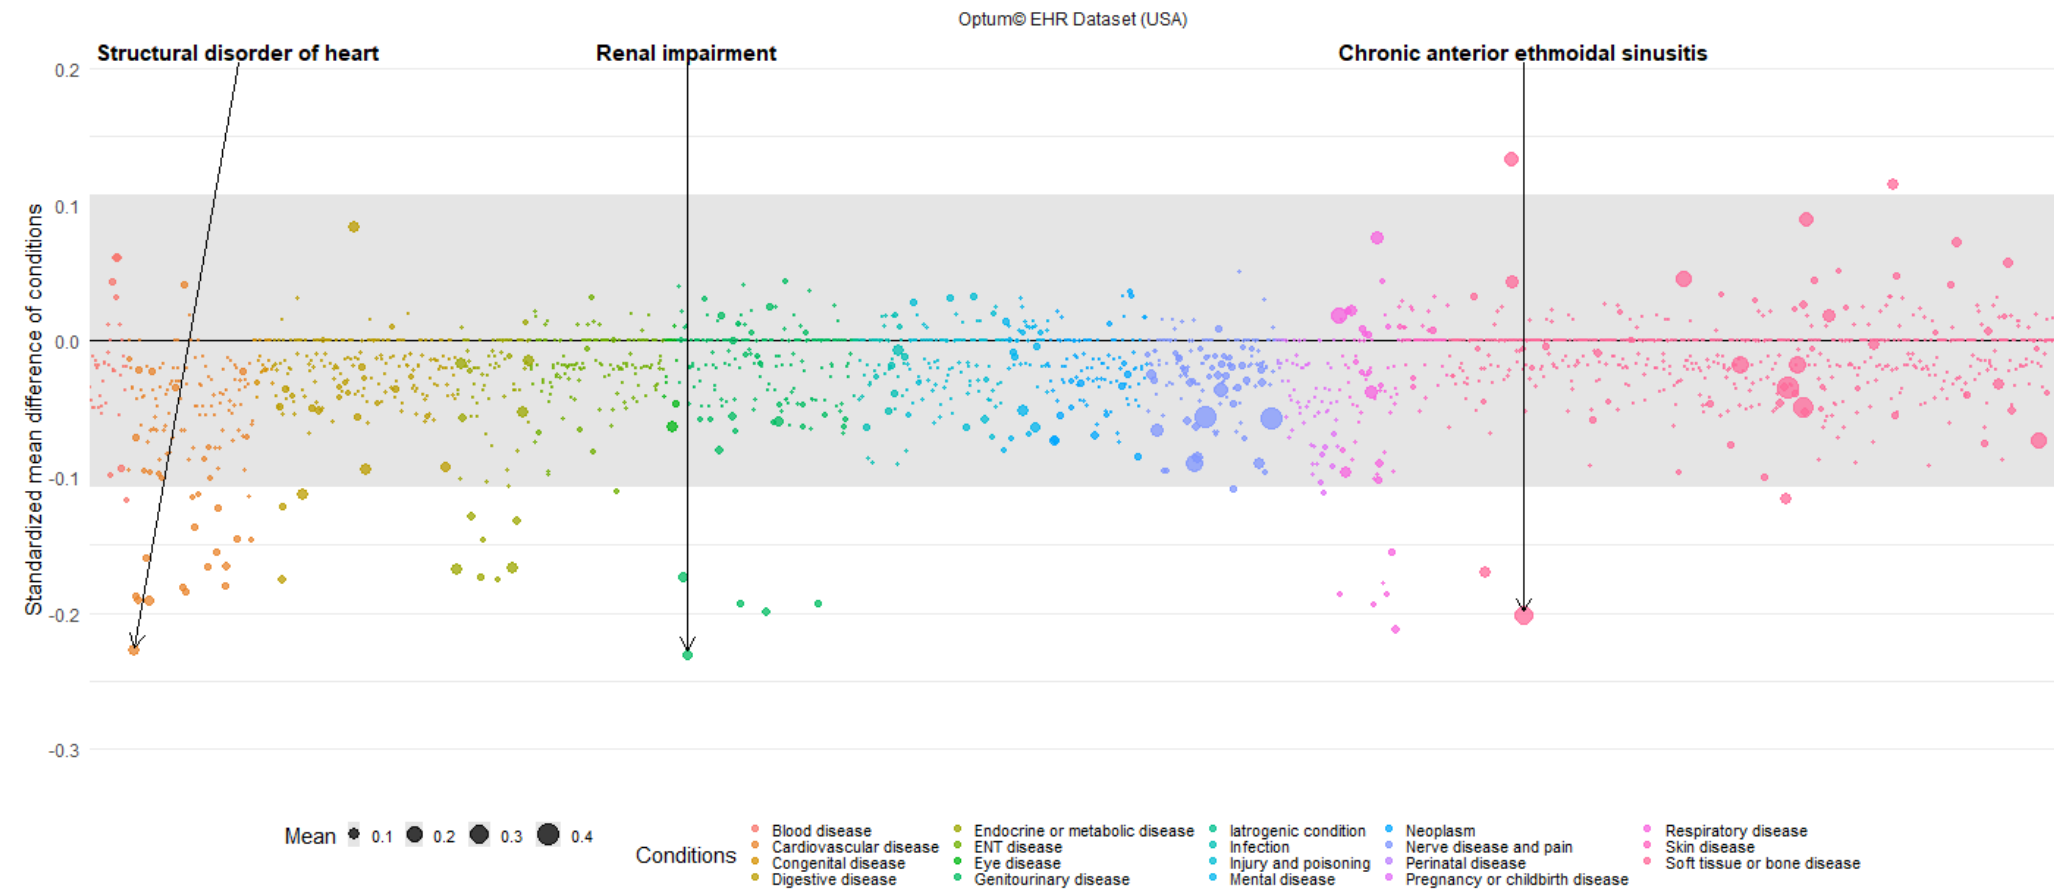

# Unraveling COVID-19: a large-scale characterization of 4.5 million COVID-19 cases using CHARYBDIS

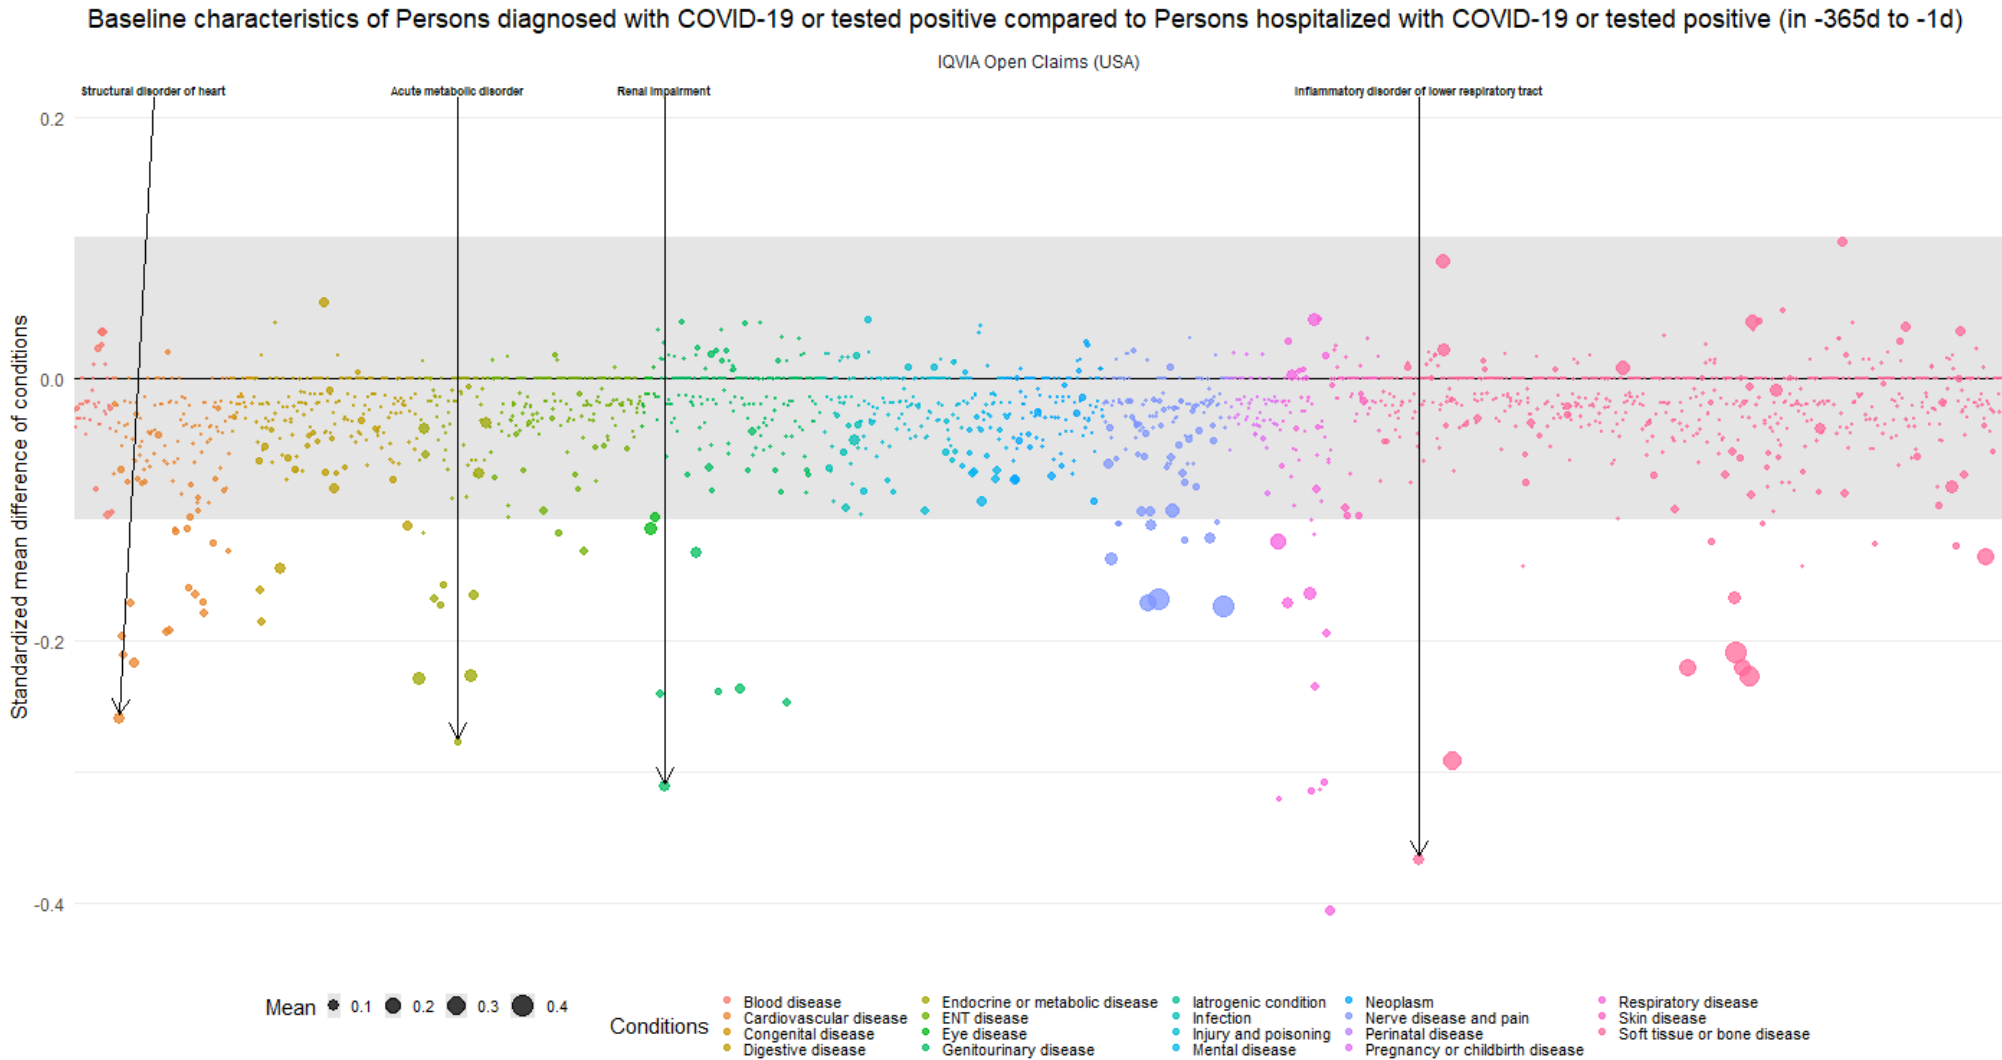

# Unraveling COVID-19: a large-scale characterization of 4.5 million COVID-19 cases using CHARYBDIS

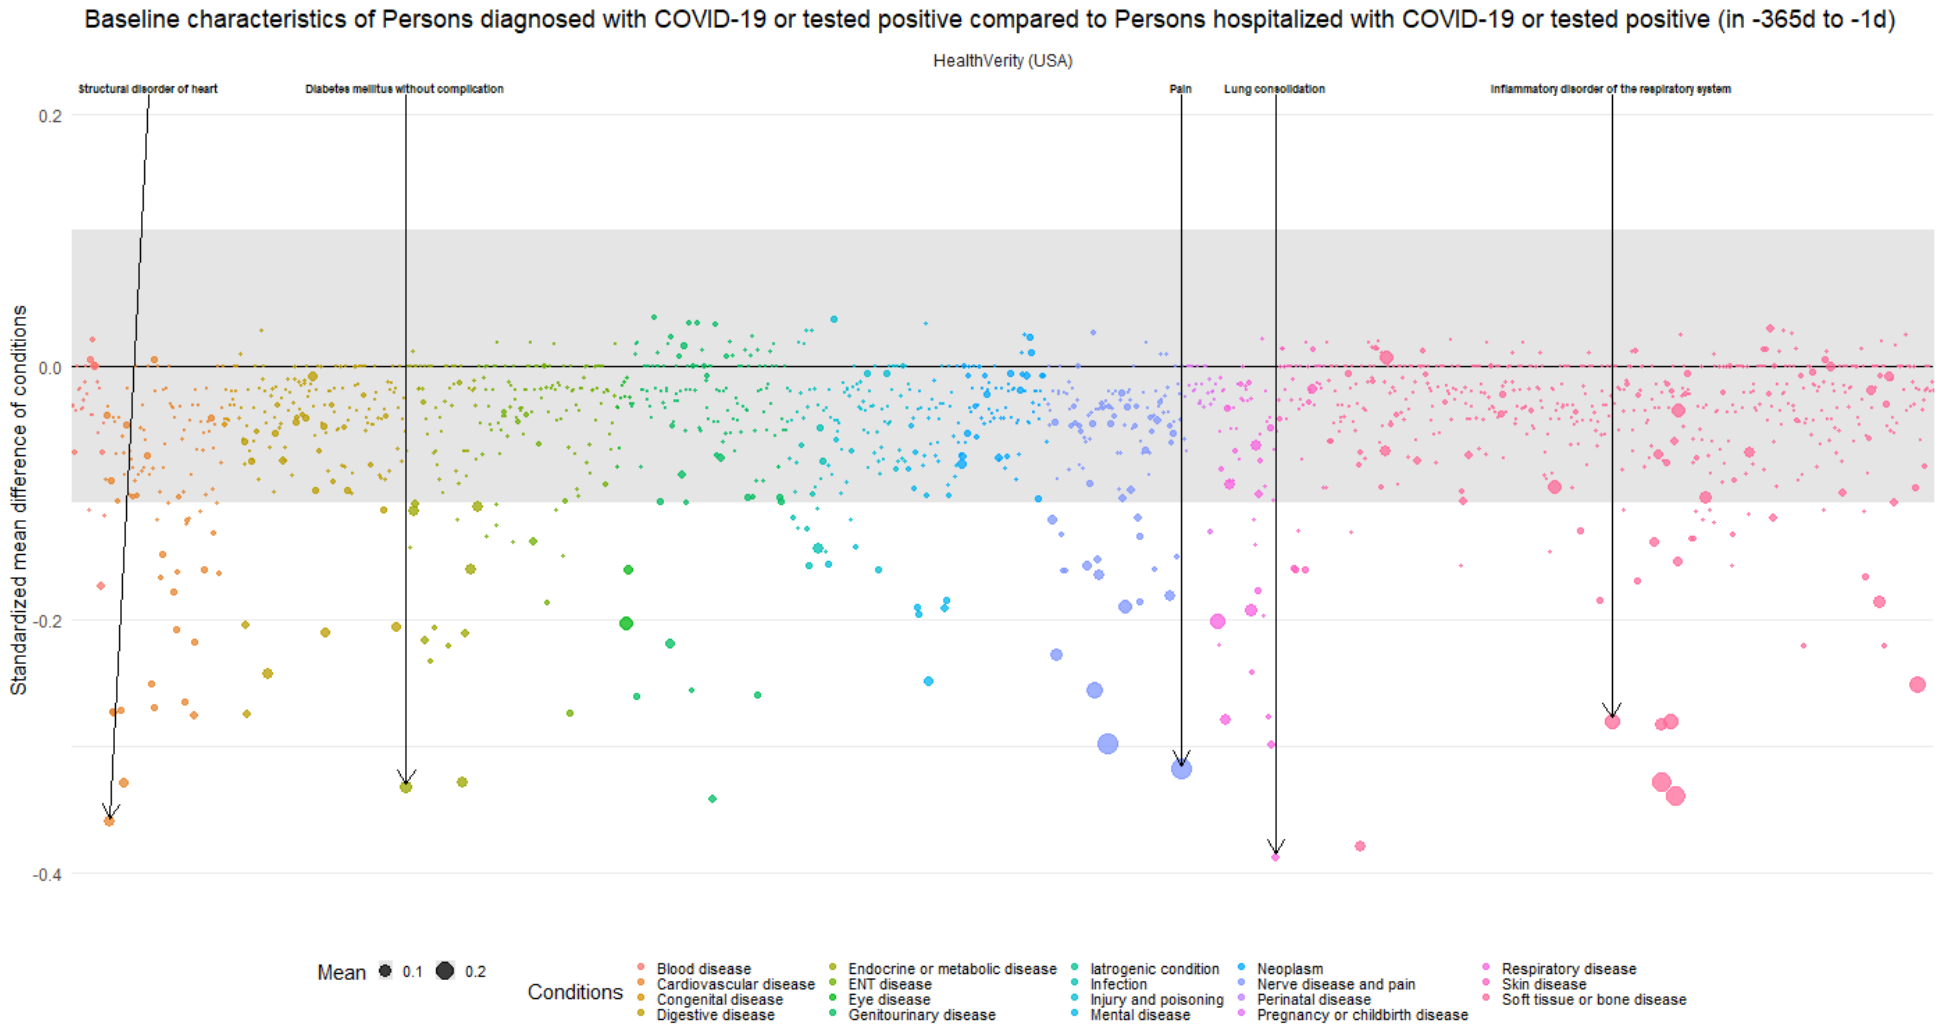

# Unraveling COVID-19: a large-scale characterization of 4.5 million COVID-19 cases using CHARYBDIS

Baseline characteristics of Persons diagnosed with COVID-19 or tested positive compared to Persons hospitalized with COVID-19 or tested positive (in -365d to -1d)

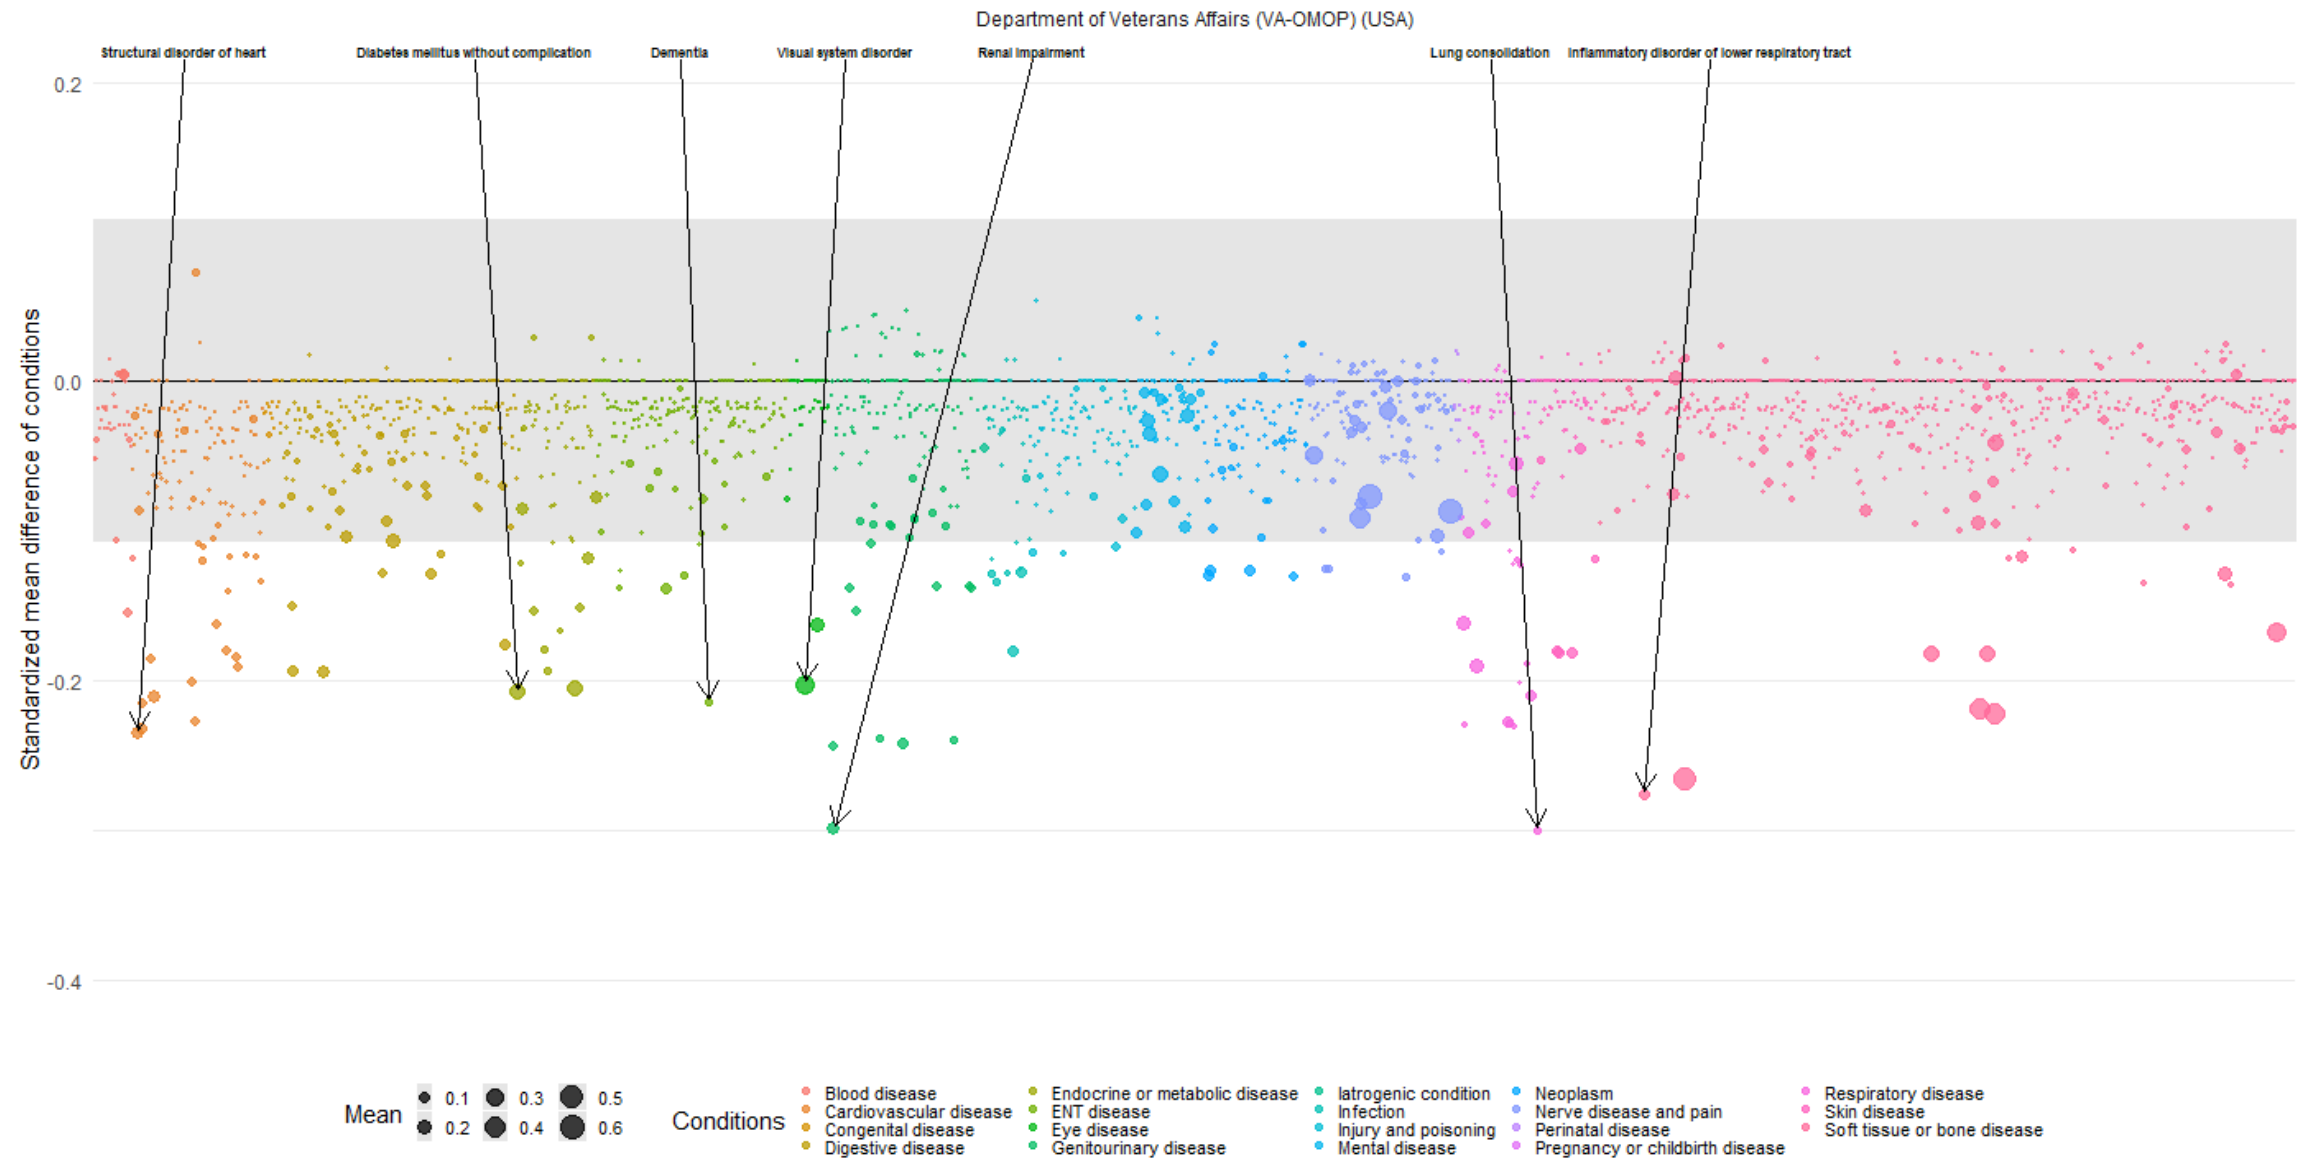



# Unraveling COVID-19: a large-scale characterization of 4.5 million COVID-19 cases using CHARYBDIS

Baseline characteristics of Persons diagnosed with COVID-19 or tested positive compared to Persons hospitalized with COVID-19 or tested positive (in -365d to -1d)

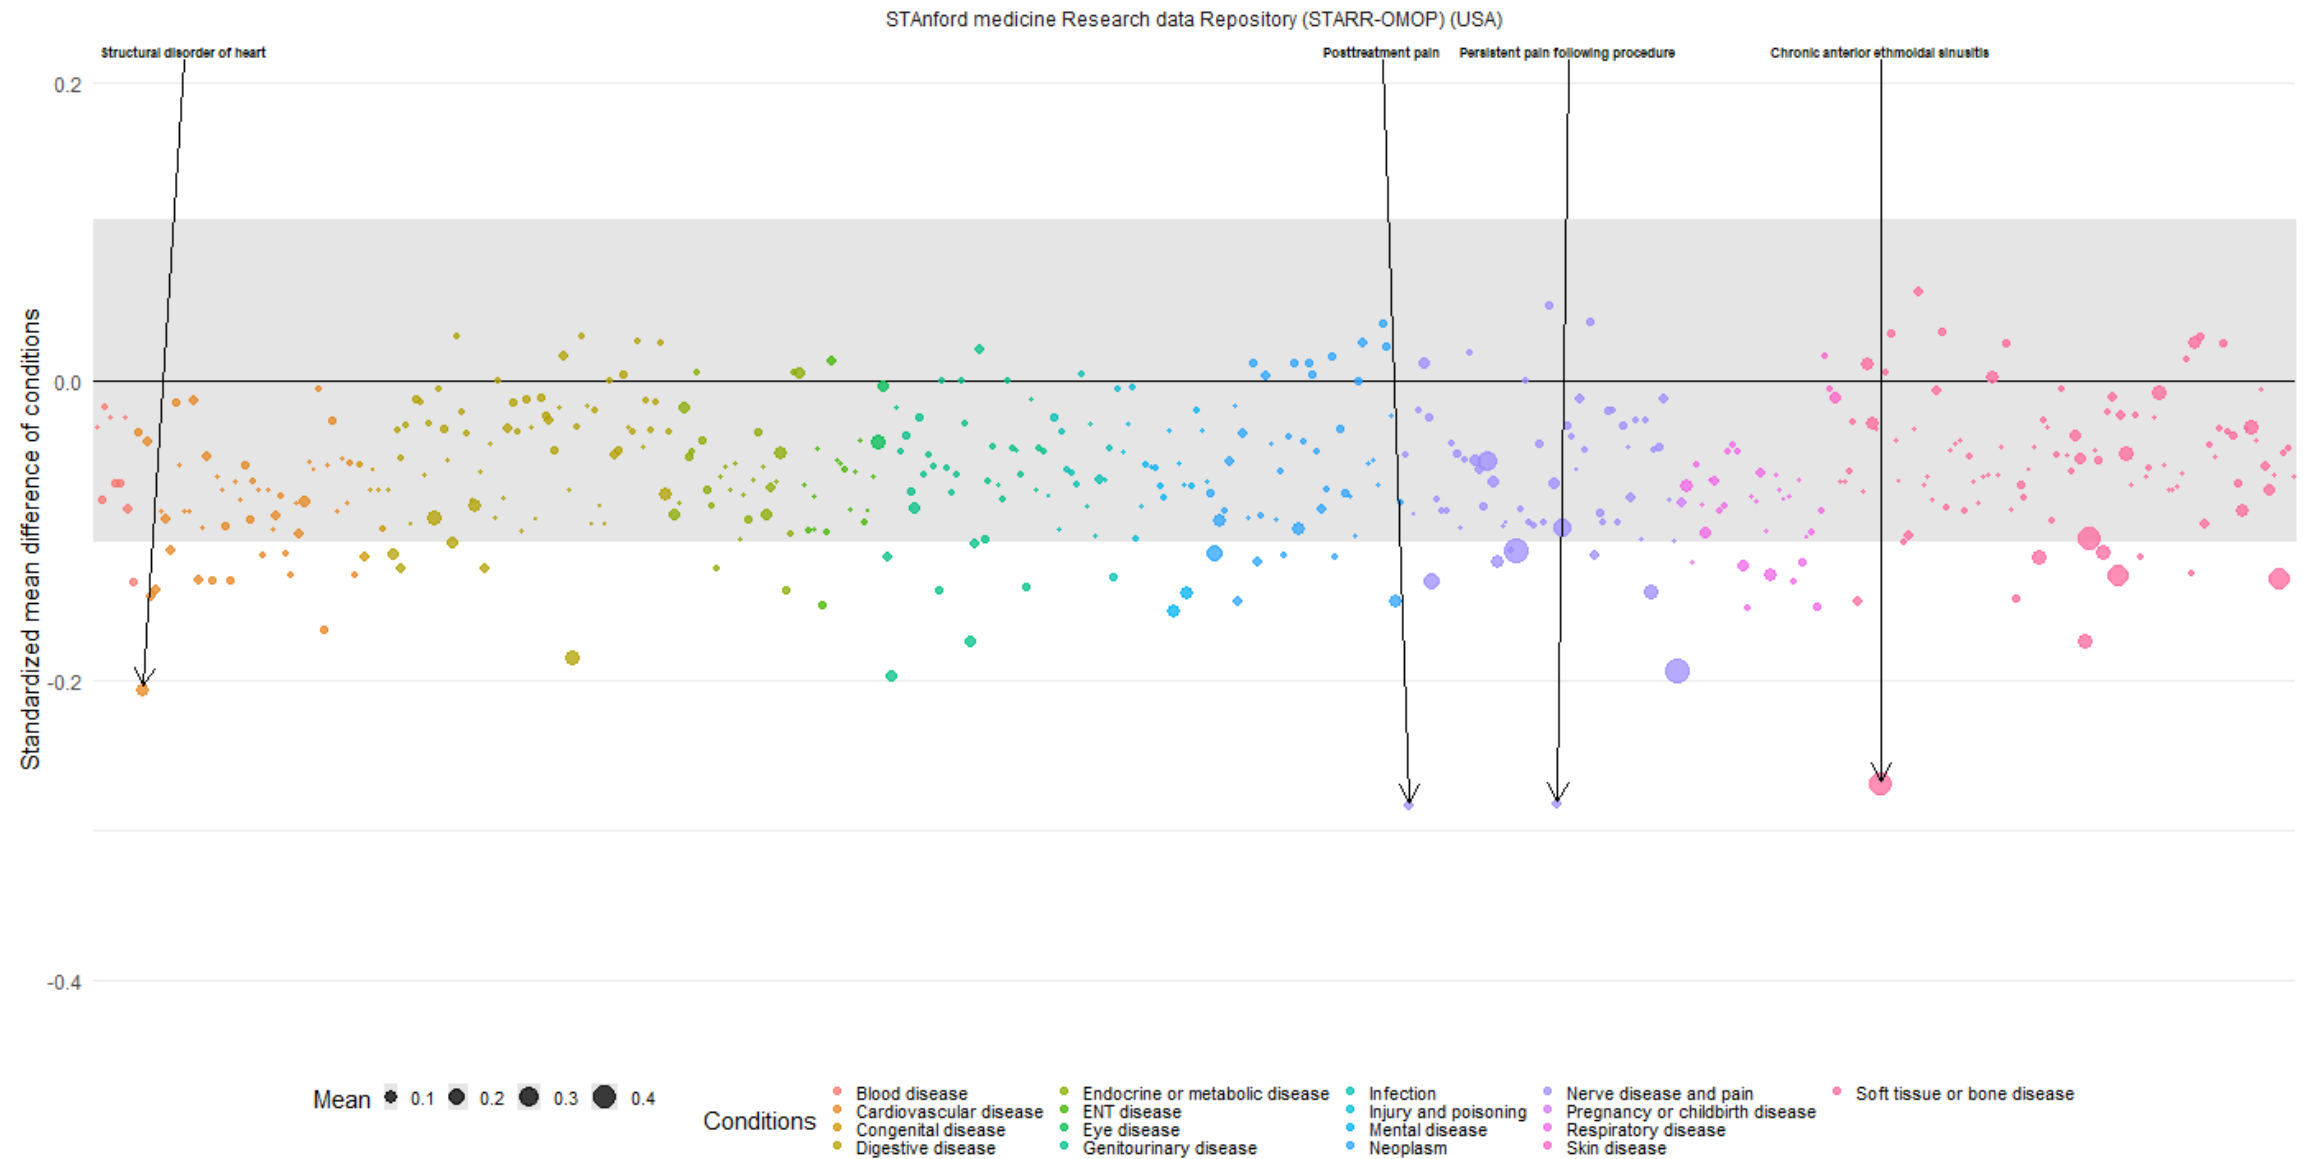

# Unraveling COVID-19: a large-scale characterization of 4.5 million COVID-19 cases using CHARYBDIS

Baseline characteristics of Persons diagnosed with COVID-19 or tested positive compared to Persons hospitalized with COVID-19 or tested positive (in -365d to -1d)

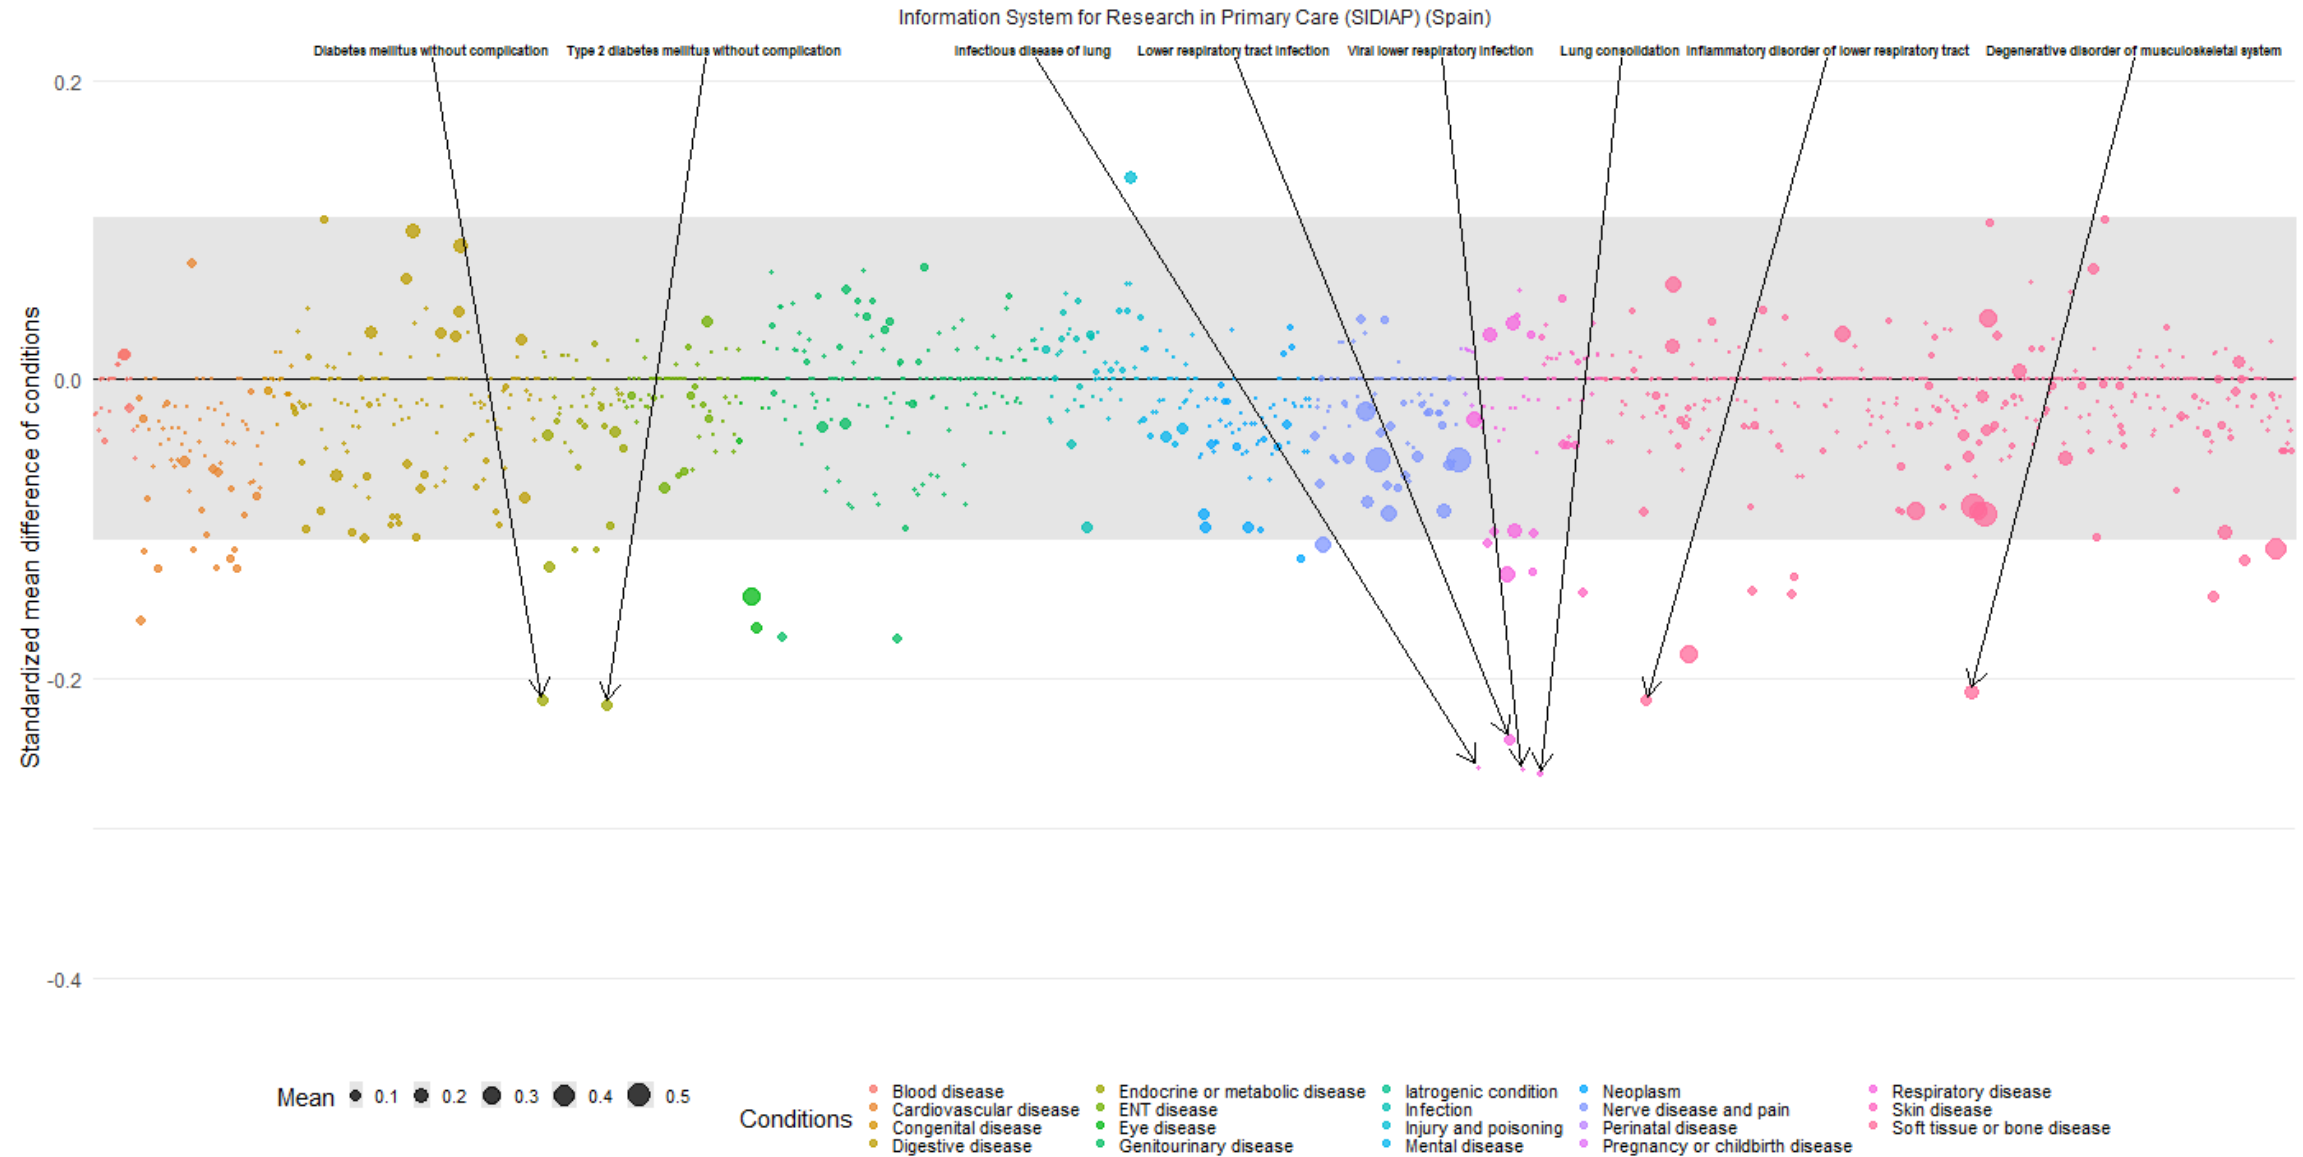

# Unraveling COVID-19: a large-scale characterization of 4.5 million COVID-19 cases using CHARYBDIS

Baseline characteristics of Persons diagnosed with COVID-19 or tested positive compared to Persons hospitalized with COVID-19 or tested positive (in -365d to -1d)

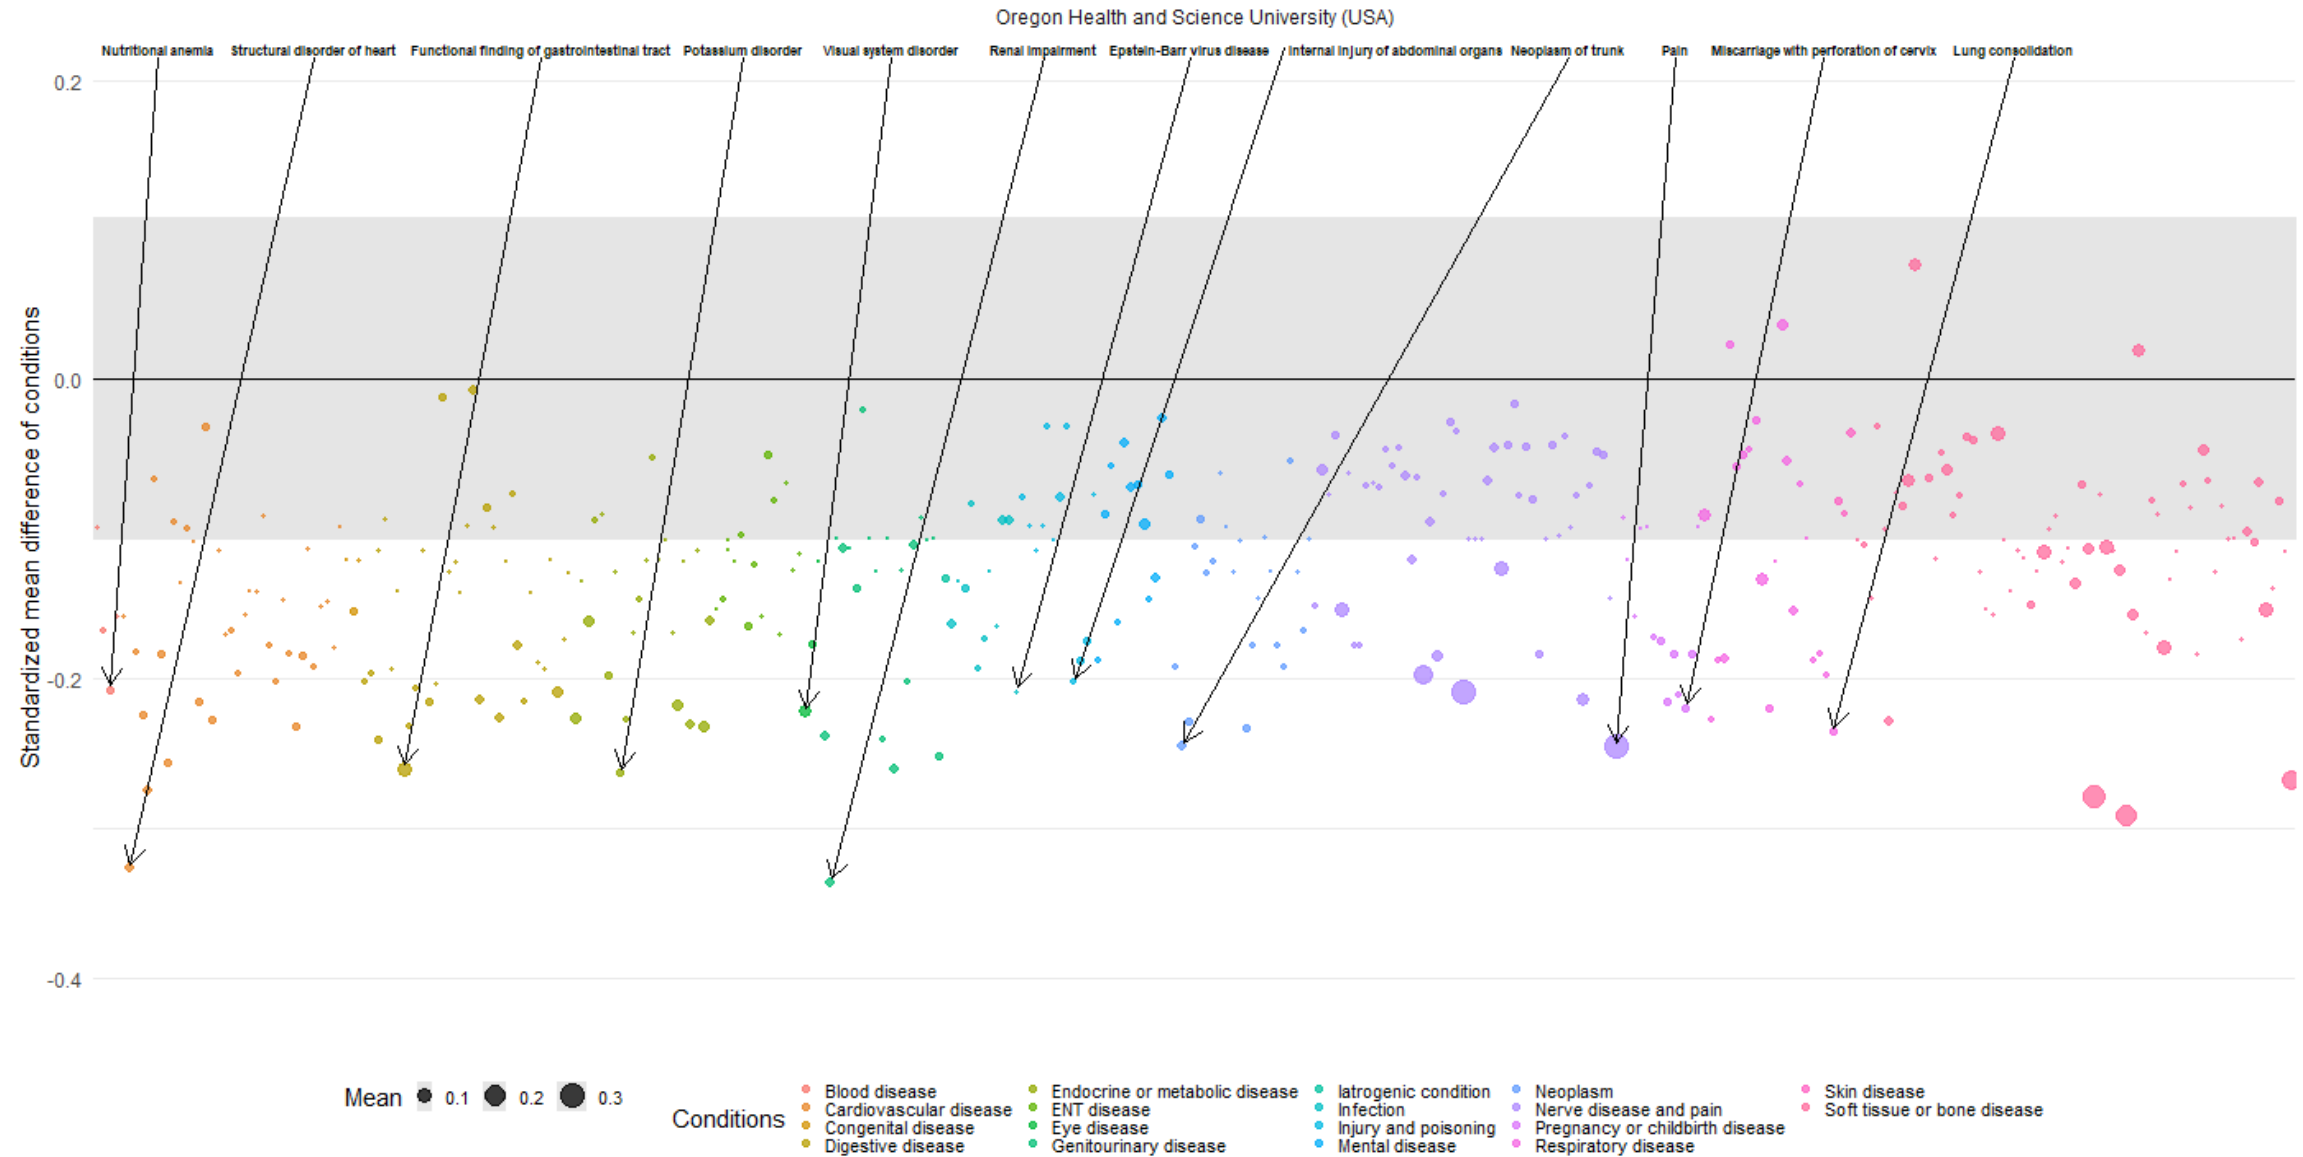

# Unraveling COVID-19: a large-scale characterization of 4.5 million COVID-19 cases using CHARYBDIS

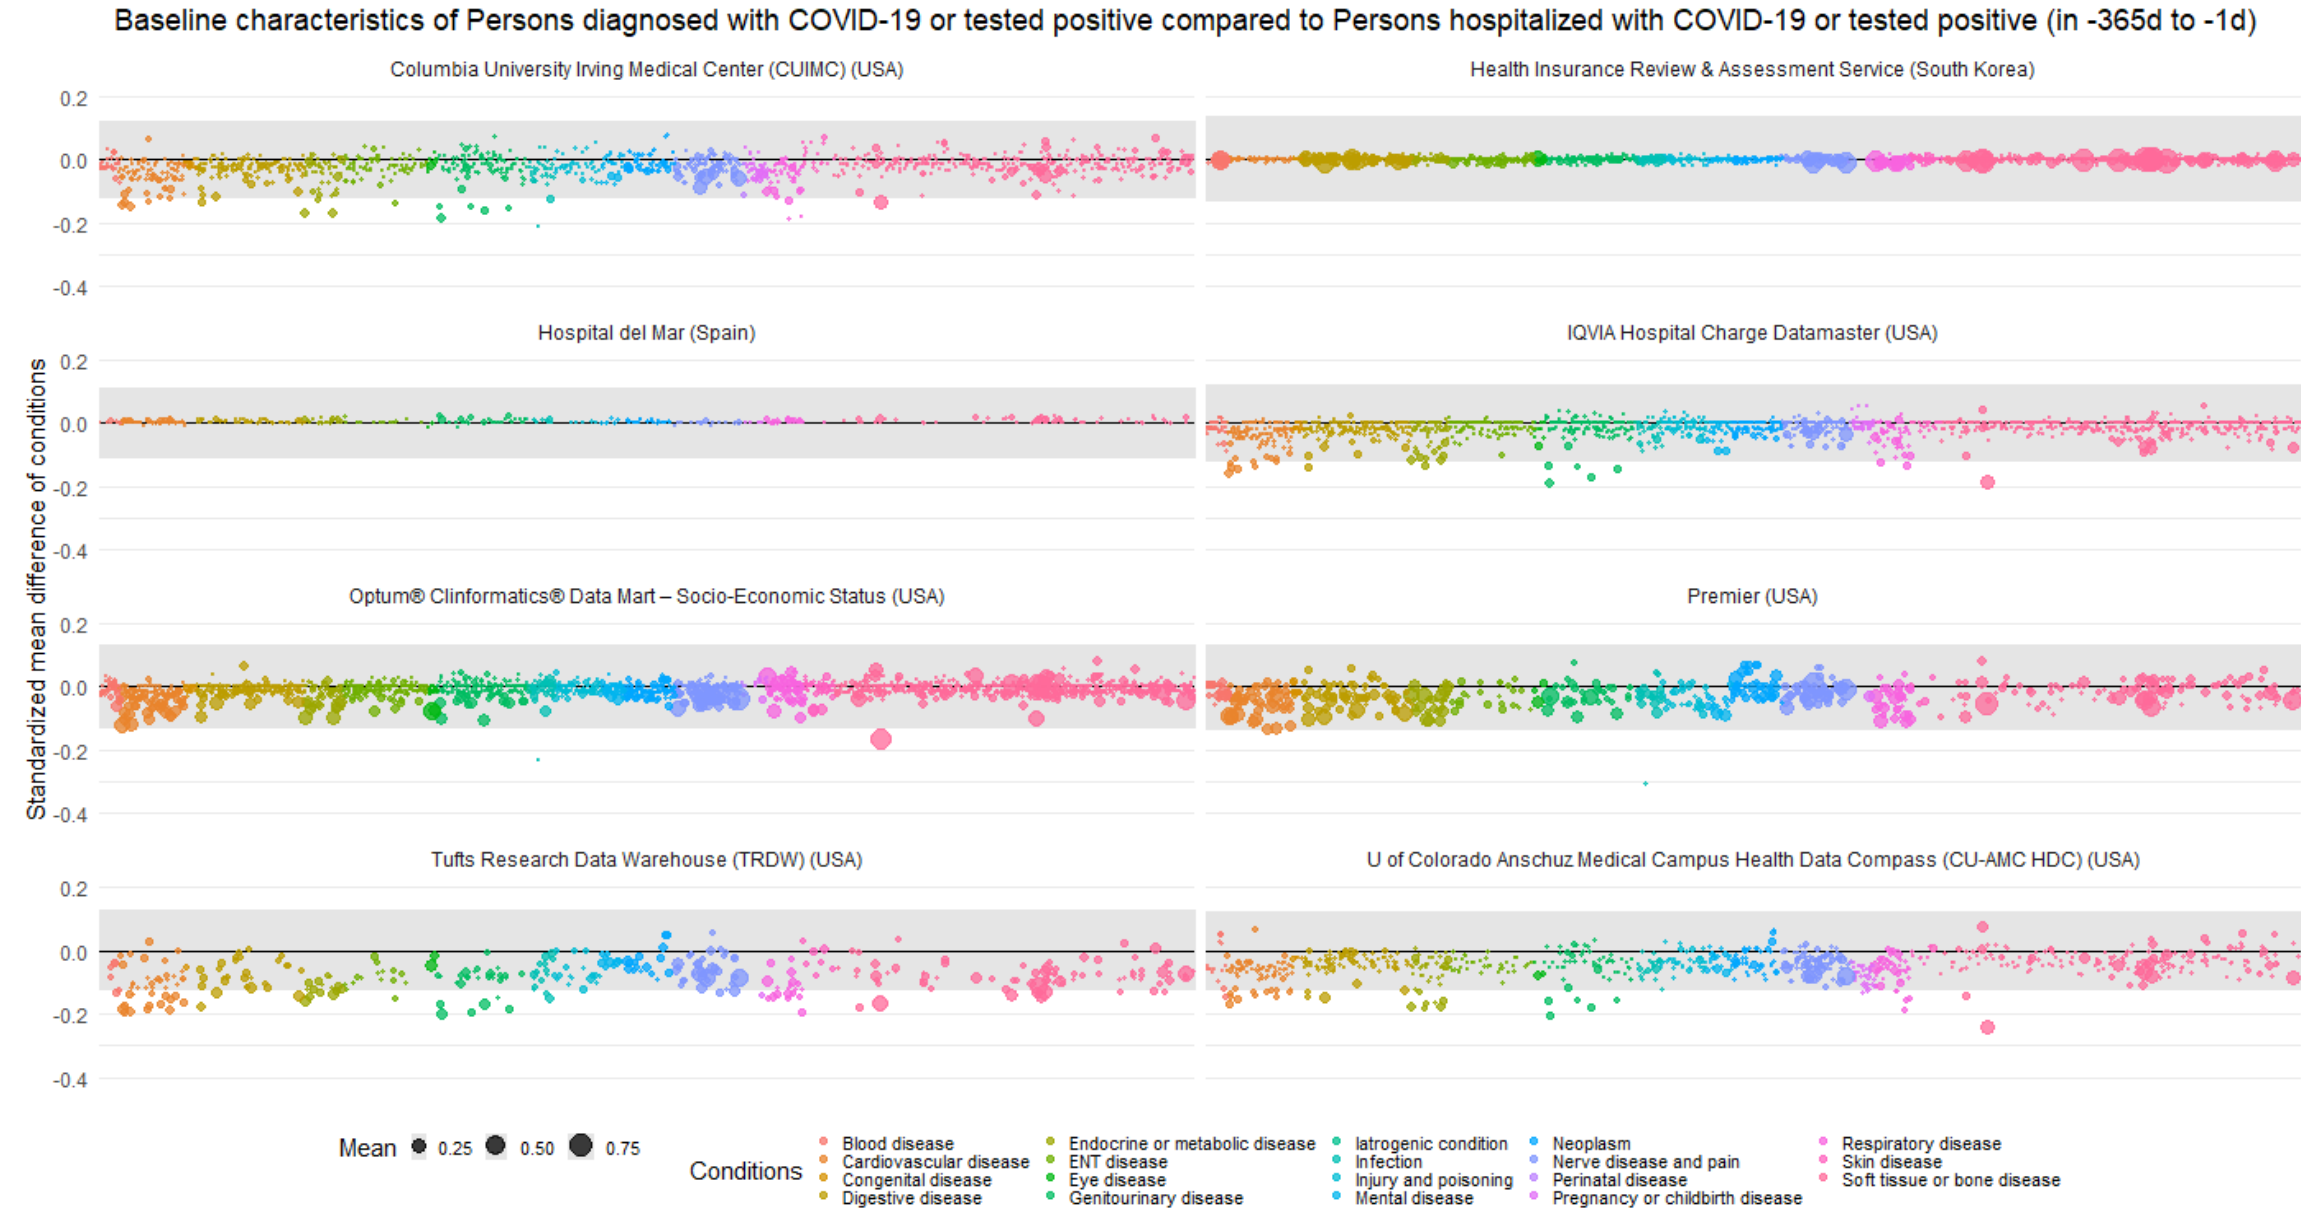

# Unraveling COVID-19: a large-scale characterization of 4.5 million COVID-19 cases using CHARYBDIS

## B. Medications

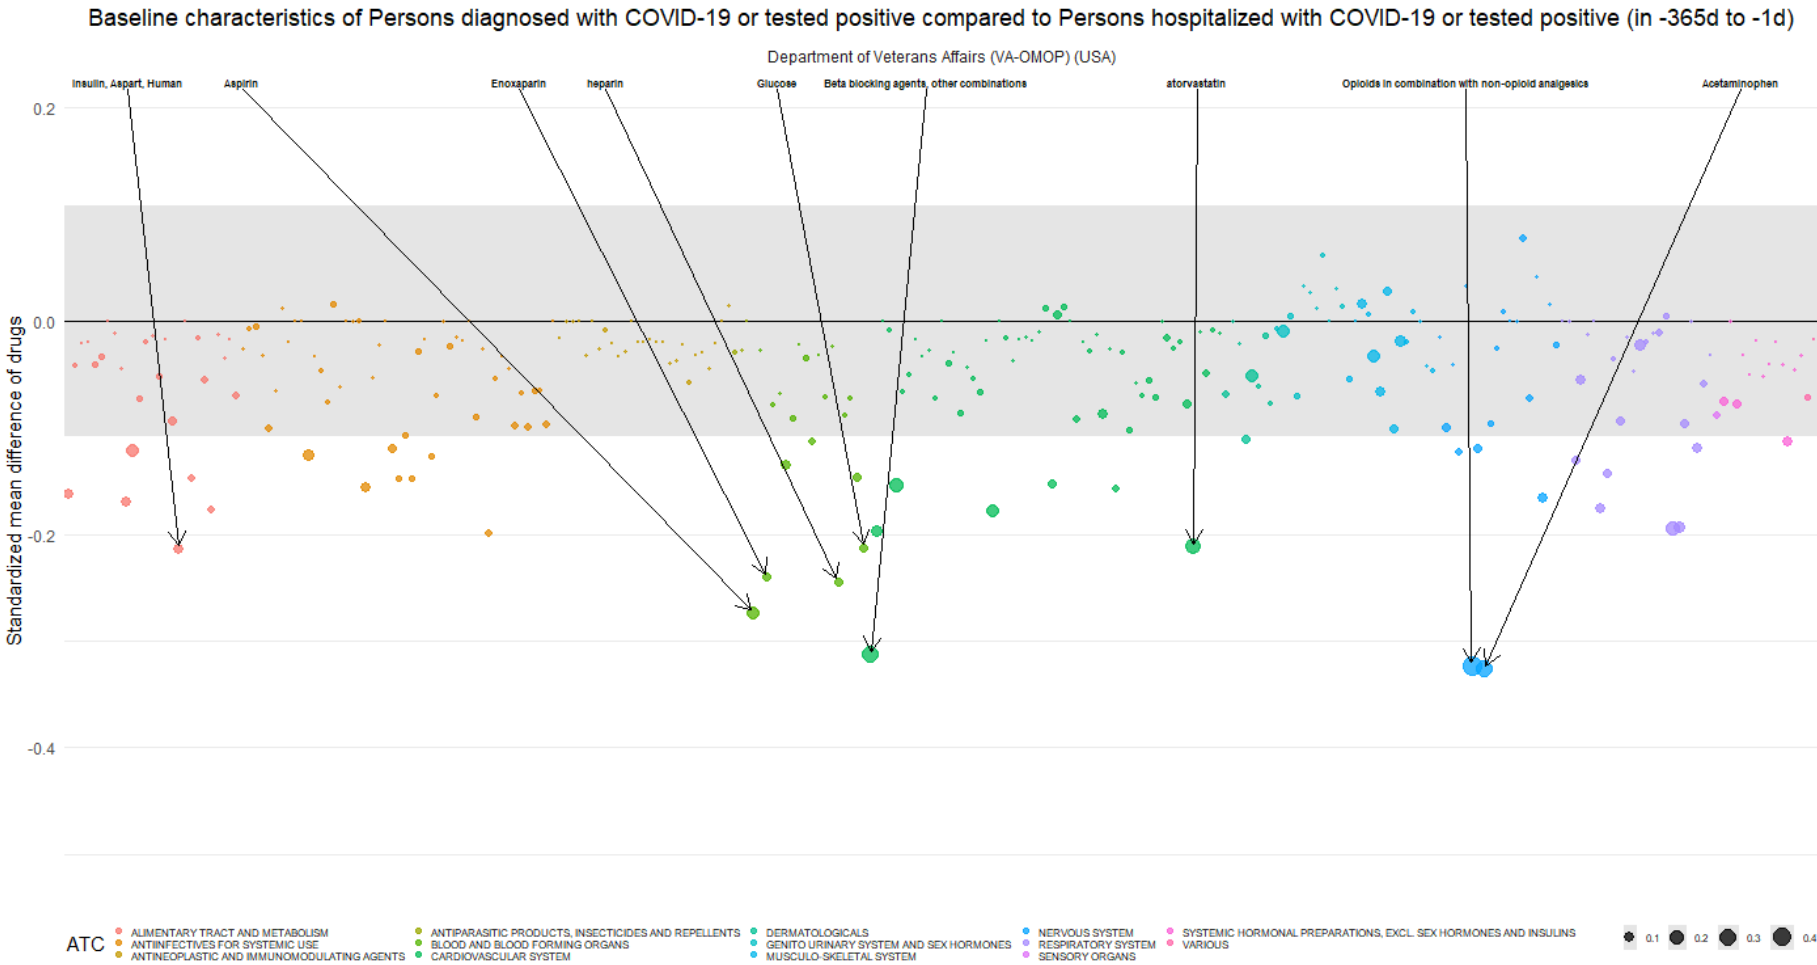

# Unraveling COVID-19: a large-scale characterization of 4.5 million COVID-19 cases using CHARYBDIS

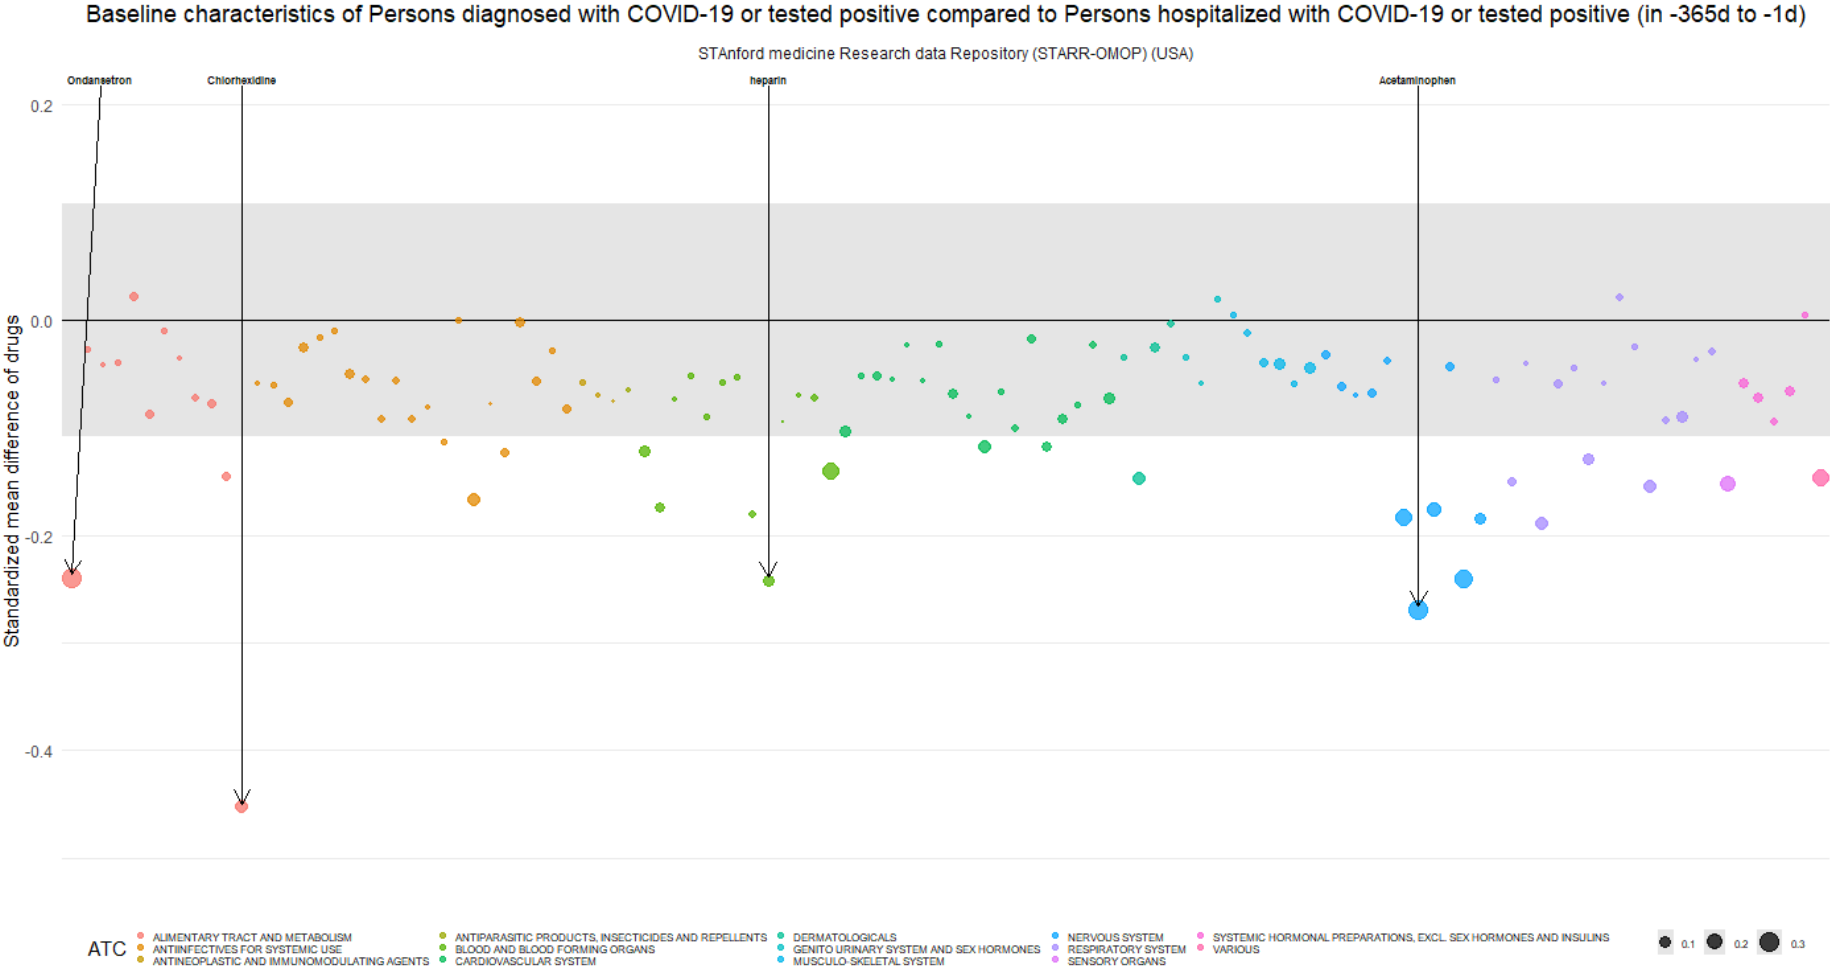

# Unraveling COVID-19: a large-scale characterization of 4.5 million COVID-19 cases using CHARYBDIS

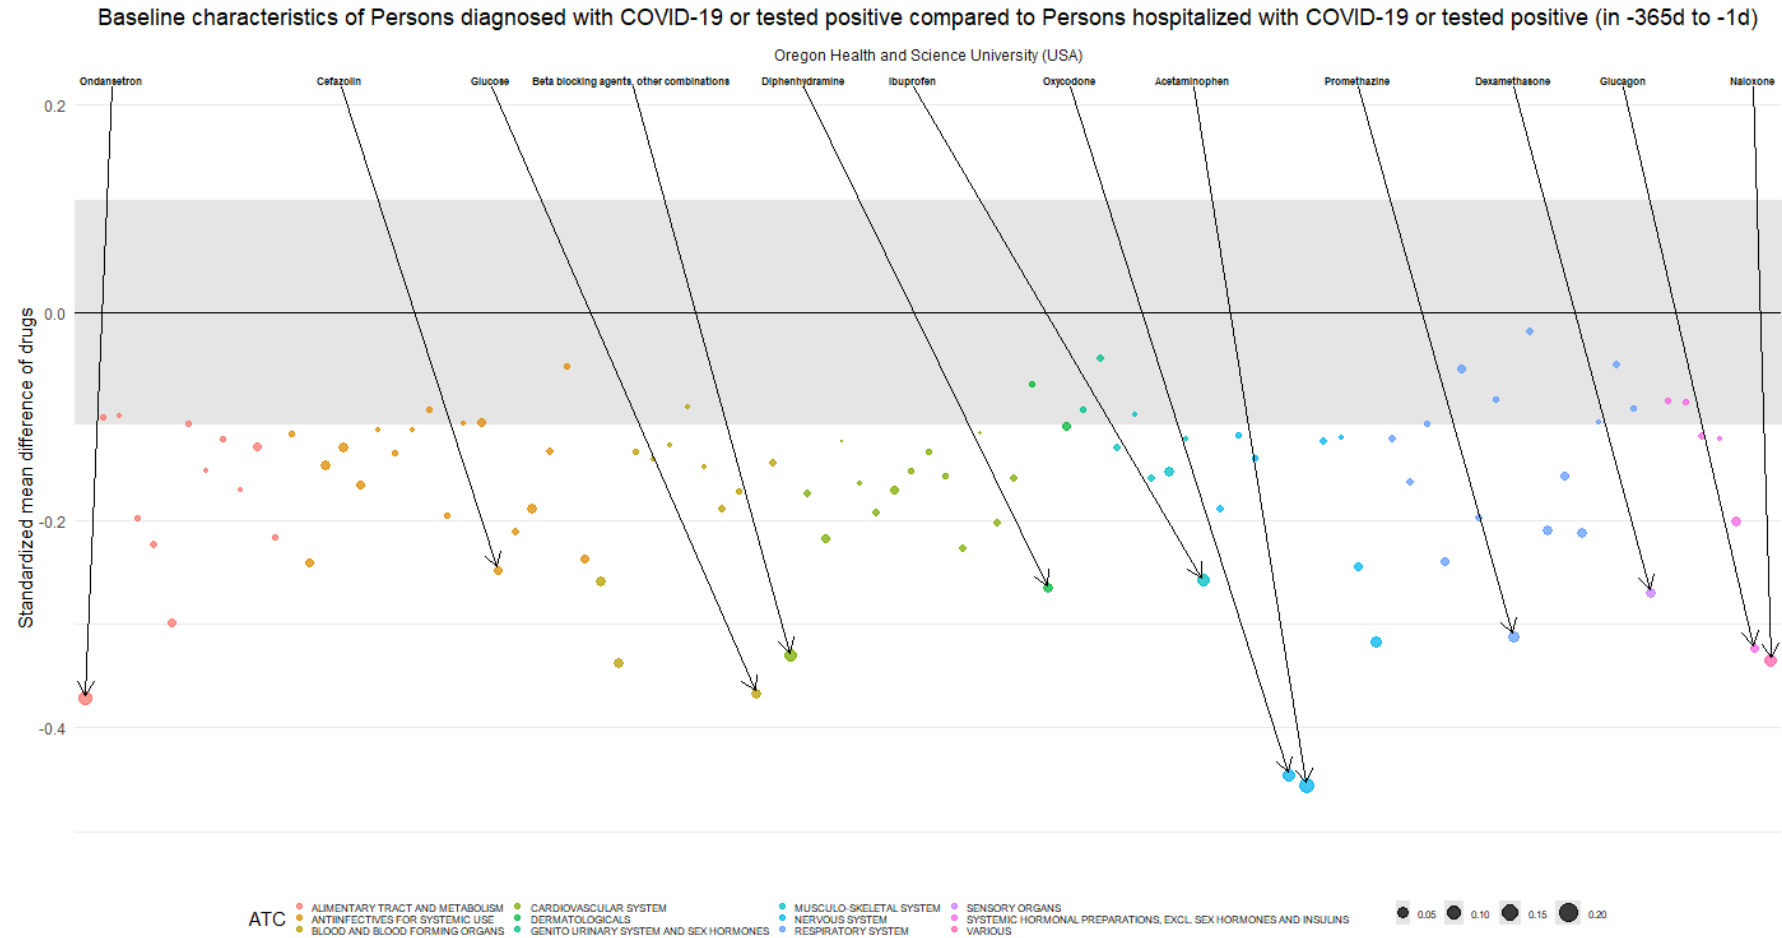

# Unraveling COVID-19: a large-scale characterization of 4.5 million COVID-19 cases using CHARYBDIS

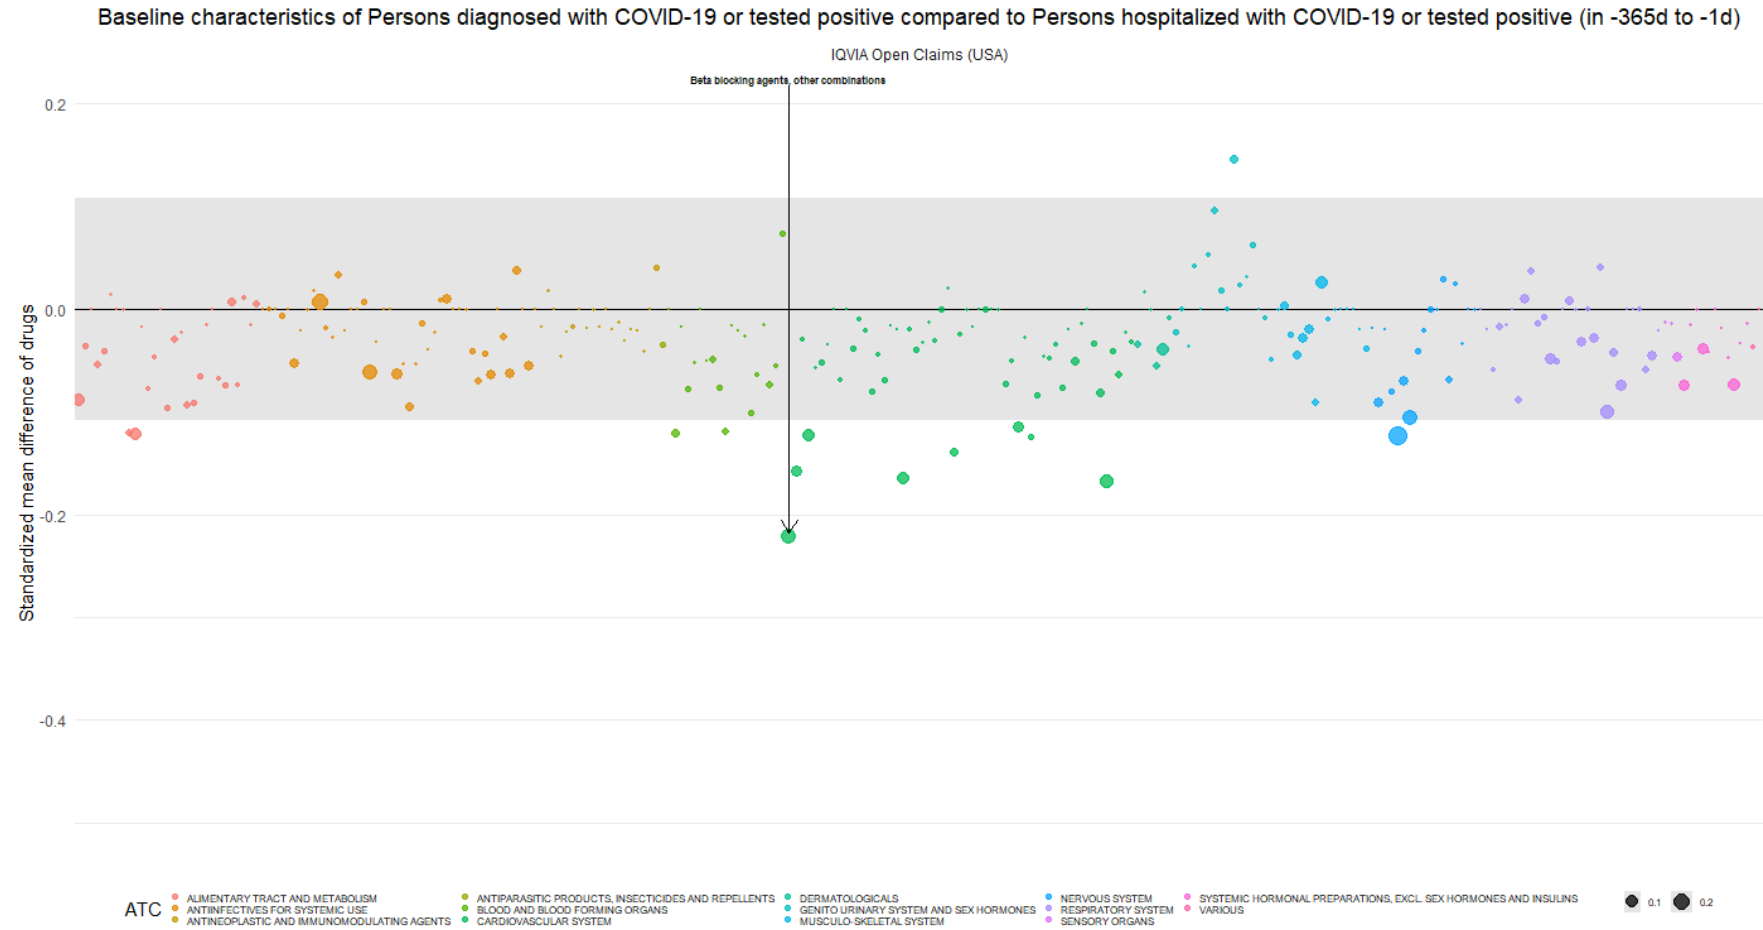



# Unraveling COVID-19: a large-scale characterization of 4.5 million COVID-19 cases using CHARYBDIS

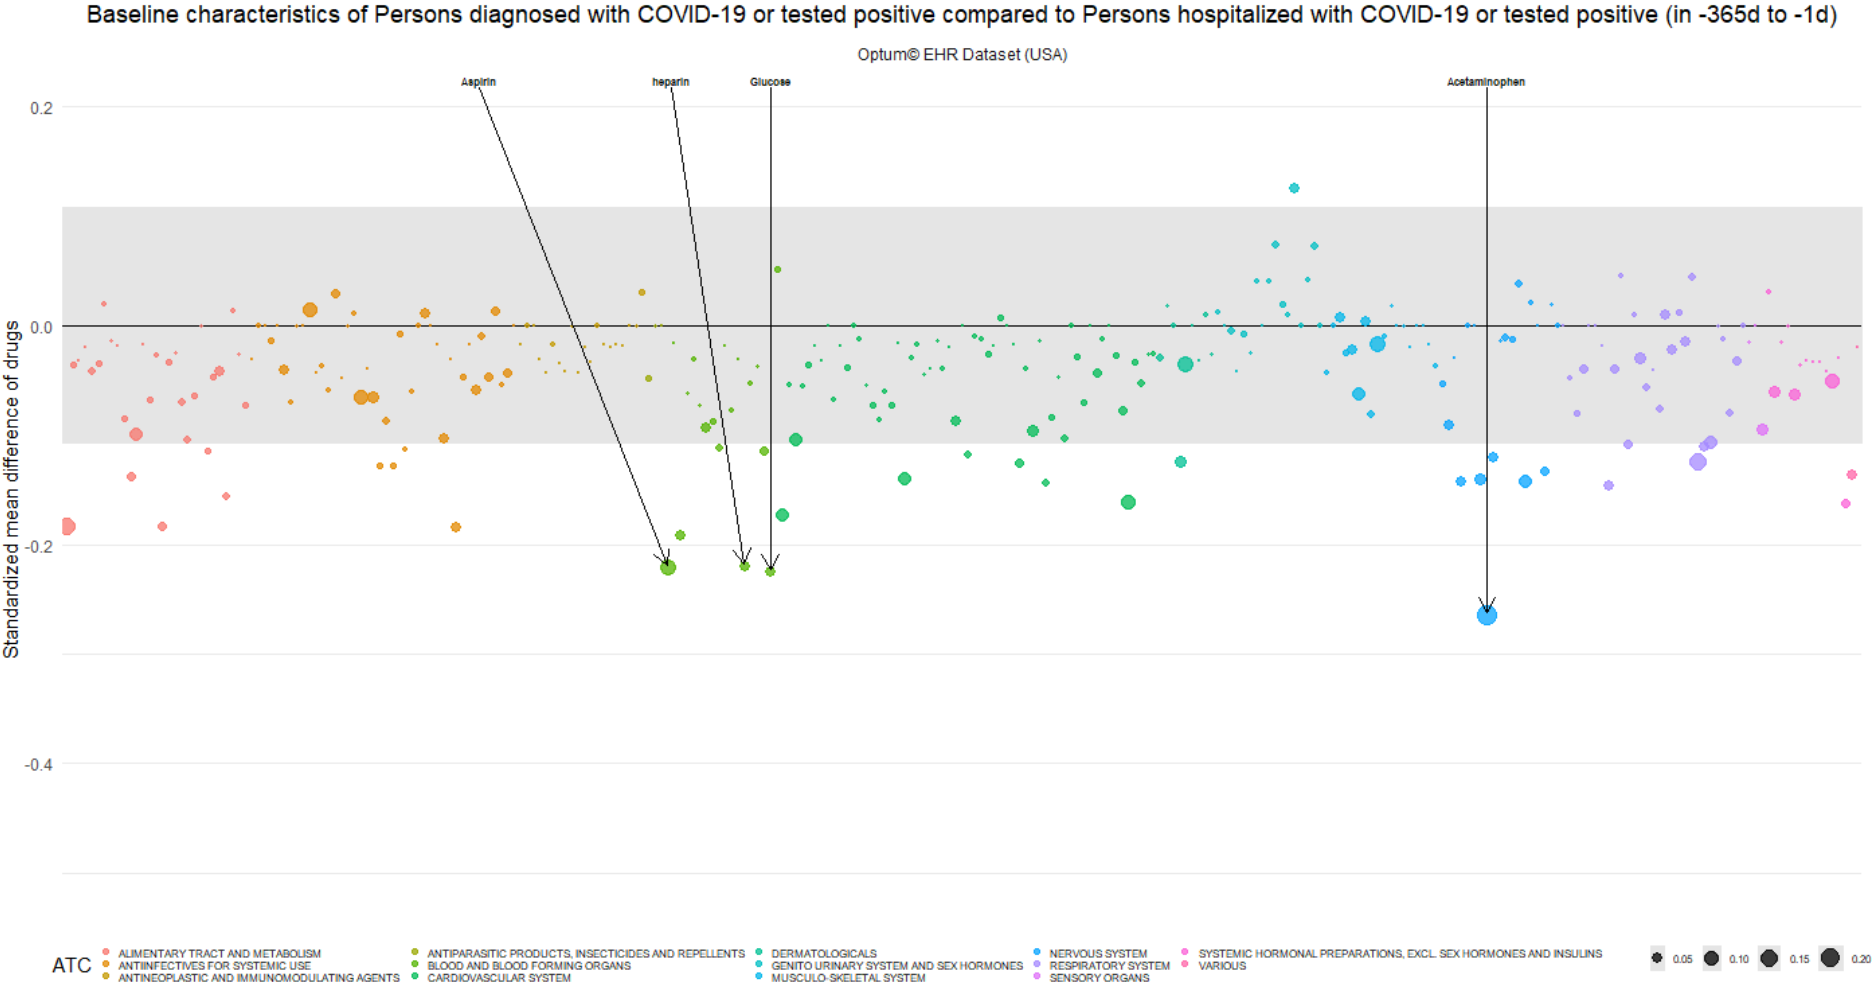

# Unraveling COVID-19: a large-scale characterization of 4.5 million COVID-19 cases using CHARYBDIS

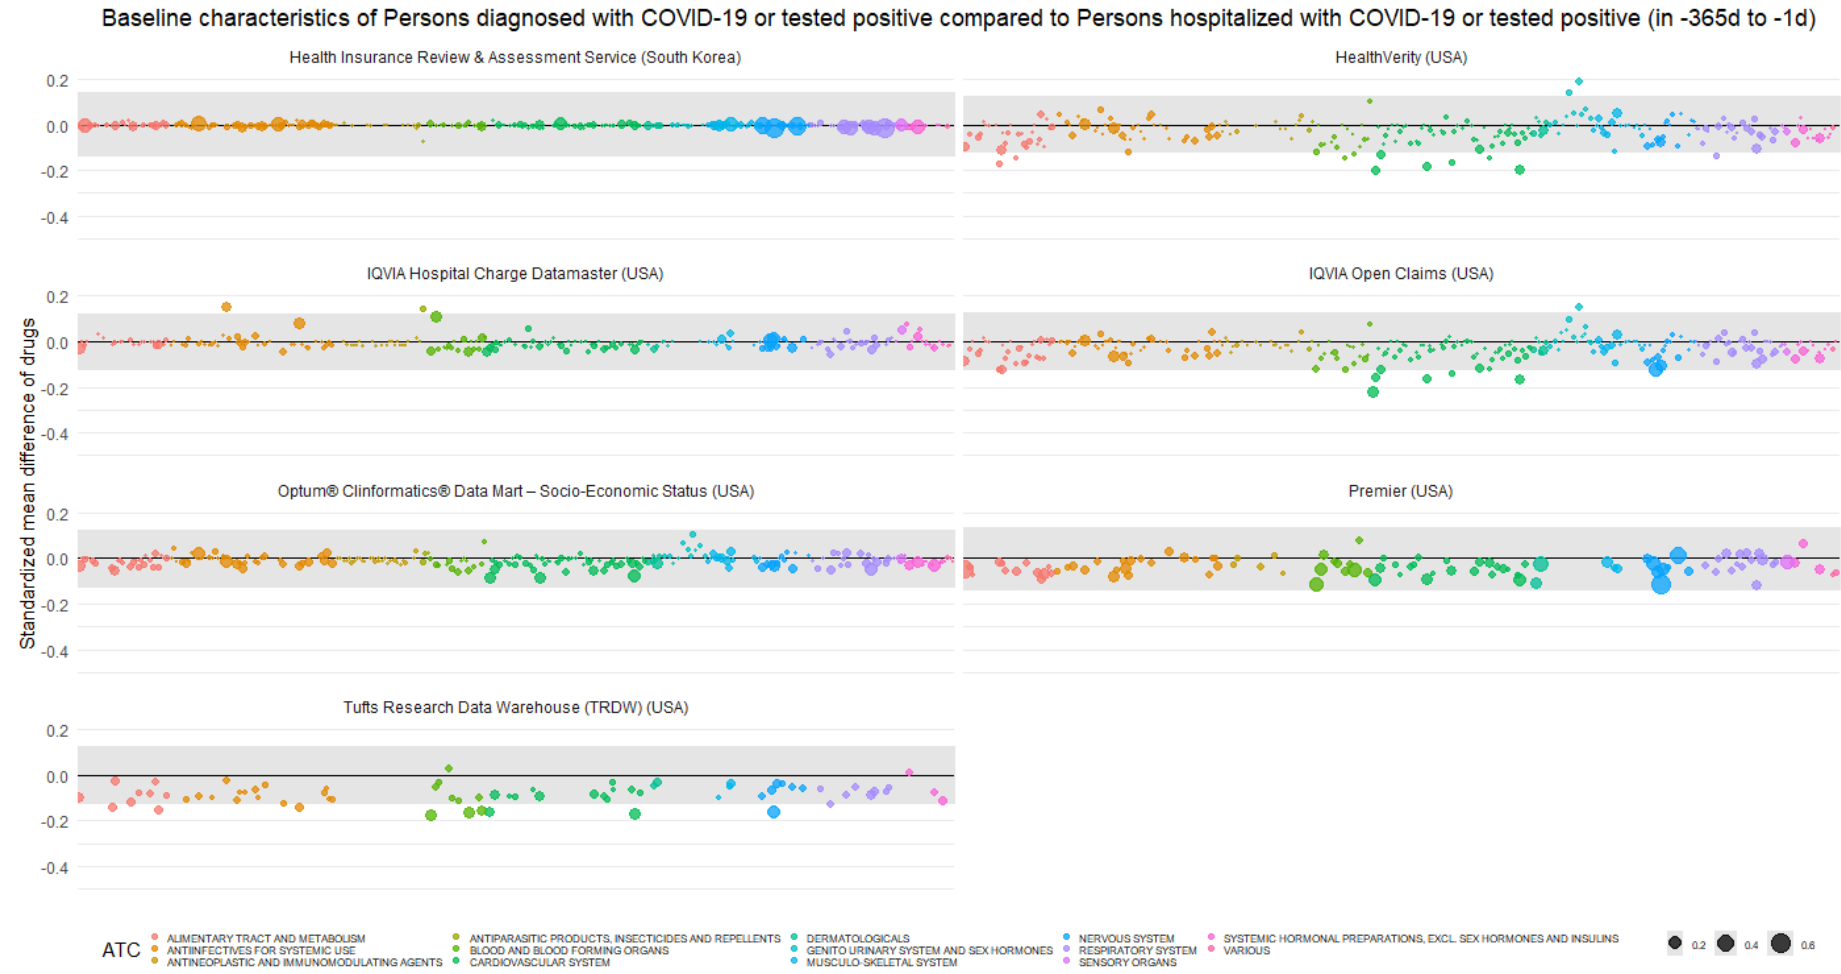

# Unraveling COVID-19: a large-scale characterization of 4.5 million COVID-19 cases using CHARYBDIS

Supplementary Table 3. Number of persons in each CHARYBDIS cohort by database in the OHDSI COVID-19 Network.

| Region        | Database Name                               | No Prior Observation Period Required               |                                      |                                                       | At Least One Year of Prior Observation Period      |                                      |                                                       |
|---------------|---------------------------------------------|----------------------------------------------------|--------------------------------------|-------------------------------------------------------|----------------------------------------------------|--------------------------------------|-------------------------------------------------------|
|               |                                             | Persons with a COVID-19 diagnosis or positive test | Persons hospitalized with a COVID-19 | Persons hospitalized and requiring intensive services | Persons with a COVID-19 diagnosis or positive test | Persons hospitalized with a COVID-19 | Persons hospitalized and requiring intensive services |
| ASIA          |                                             |                                                    |                                      |                                                       |                                                    |                                      |                                                       |
|               | HIRA (South Korea)                          | NR                                                 | 7,599                                | 130                                                   | NR                                                 | 7,599                                | 130                                                   |
|               | DCMC (South Korea)                          | 559                                                | 46                                   | NR                                                    | 372                                                | 30                                   | NR                                                    |
|               | NFHCRD (China)                              | 403                                                | 304                                  | 6                                                     | 24                                                 | 24                                   | NR                                                    |
| UNITED STATES |                                             |                                                    |                                      |                                                       |                                                    |                                      |                                                       |
|               | HealthVerity (National)                     | 587,683                                            | 22,887                               | 1,289                                                 | 114,173                                            | 7,581                                | 471                                                   |
|               | Premier (National)                          | 417,650                                            | 156,187                              | 36,735                                                | 530                                                | 259                                  | 84                                                    |
|               | OptumEHR (National)                         | 217,772                                            | 36,717                               | 4,425                                                 | 177,465                                            | 28,464                               | 3,389                                                 |
|               | Optum SES (National)                        | 7,863                                              | 4,336                                | 587                                                   | 5,962                                              | 3,370                                | 449                                                   |
|               | STARR-OMOP (California)                     | 4,788                                              | 744                                  | 62                                                    | 3,328                                              | 615                                  | 46                                                    |
|               | TRDW (Massachusetts)                        | 1,250                                              | 326                                  | 102                                                   | 664                                                | 186                                  | 40                                                    |
|               | VA-OMOP (National)                          | 57,937                                             | 10,951                               | 1,904                                                 | 55,557                                             | 10,471                               | 1,774                                                 |
|               | IQVIA-OpenClaims (National)                 | 2,785,812                                          | 533,997                              | 47,715                                                | 2,578,663                                          | 502,933                              | 45,549                                                |
|               | CUIMC (New York)                            | 37,773                                             | 7,353                                | 135                                                   | 32,090                                             | 5,707                                | 98                                                    |
|               | CU-AMC-HDC (Colorado)                       | 9,481                                              | 1,874                                | 452                                                   | 7,270                                              | 1,434                                | 344                                                   |
|               | UWM-CRD (Washington)                        | 3,245                                              | 733                                  | 117                                                   | 1,848                                              | 534                                  | 68                                                    |
|               | IQVIA Hospital Charge Datamaster (National) | 209,534                                            | 77,853                               | 18,274                                                | 128,140                                            | 46,865                               | 10,971                                                |
|               | OHSU (Oregon)                               | 11,187                                             | 627                                  | 69                                                    | 5,618                                              | 466                                  | 42                                                    |
| EUROPE        |                                             |                                                    |                                      |                                                       |                                                    |                                      |                                                       |
|               | HM-Hospitales (Spain)                       | NR                                                 | 2,544                                | 1,397                                                 | NR                                                 | NR                                   | NR                                                    |
|               | SIDIAP (Spain)                              | 124,305                                            | 18,369                               | NR                                                    | 122,141                                            | 18,202                               | NR                                                    |
|               | SIDIAP-H (Spain)                            | 43,411                                             | 7,197                                | NR                                                    | 42,786                                             | 7,139                                | NR                                                    |
|               | HMAR (Spain)                                | NR                                                 | 2,686                                | 228                                                   | NR                                                 | 2,011                                | 181                                                   |
|               | IPCI (Netherlands)                          | 3,306                                              | 60                                   | NR                                                    | 3,047                                              | 59                                   | NR                                                    |
|               | CPRD (UK)                                   | 3,864                                              | NR                                   | NR                                                    | 3,372                                              | NR                                   | NR                                                    |
|               | IQVIA-LPD France                            | 23,592                                             | NR                                   | NR                                                    | 17,18                                              | NR                                   | NR                                                    |
|               | IQVIA-DA Germany                            | 11,500                                             | NR                                   | NR                                                    | 7,971                                              | NR                                   | NR                                                    |
|               | IQVIA-LPD Italy                             | 4,816                                              | NR                                   | NR                                                    | 4,488                                              | NR                                   | NR                                                    |
| TOTAL         |                                             | 4,567,731                                          | 893,390                              | 113,627                                               | 3,295,509                                          | 643,949                              | 63,636                                                |

# Unraveling COVID-19: a large-scale characterization of 4.5 million COVID-19 cases using CHARYBDIS

\* Databases with no prior observation period available: NFHCRD, HM-Hospitales.

Abbreviations: Clinical Practice Research Datalink (CPRD), Colorado University Anschuz Medical Campus Health Data Compass (CU-AMC HDC), Columbia University Irving Medical Center (CUIMC), Daegu Catholic University Medical Center (DCMC) Health Insurance Review & Assessment Service (HIRA), Hospital del Mar (HMAR), Integrated Primary Care Information (IPCI), IQVIA Disease Analyser Germany (DA Germany), IQVIA Longitudinal Patient Data France (LPD France), IQVIA Longitudinal Patient Data Italy (LPD Italy), Nanfang Hospital COVID-19 Research Database (NFHCRD) Oregon Health & Science University (OHSU) Information System for Research in Primary Care (SIDIAP), Information System for Research in Primary Care – Hospitalization Linked Data (SIDIAP-H), STAnford medicine Research data Repository (STARR-OMOP), Tufts MC Research Data Warehouse (TRDW), UW Medicine COVID Research Dataset (UWM-CRD) Department of Veterans Affairs (VA-OMOP), NR: Not Reported by Data Partner.

Supplementary Table 4. Distributions of persons diagnosed with a COVID-19 diagnosis or SARS-CoV-2 positive test in each cohort (1 year observation period required)

|                          | ASIA       | UNITED STATES |            |               |              |              |            |               |                  |                    |              |              |              |              | EUROPE        |              |              |                  |                  |                 |
|--------------------------|------------|---------------|------------|---------------|--------------|--------------|------------|---------------|------------------|--------------------|--------------|--------------|--------------|--------------|---------------|--------------|--------------|------------------|------------------|-----------------|
|                          | DCMC       | HealthVerity  | Premier    | OPTUM-EHR     | OPTUM-SES    | STARR-OMOP   | TRDW       | VA-OMOP       | IQVIA OpenClaims | IQVIA Hospital CDM | CUIMC        | CU-AMC-HDC   | UWM-CRD      | OHSU         | SIDIAP        | IPCI         | CPRD         | IQVIA LPD France | IQVIA DA Germany | IQVIA LPD Italy |
| COVID-19 Cases (N)       | 372        | 114,173       | 194        | 129,512       | 5,962        | 3,328        | 664        | 55,557        | 2,578,663        | 94,106             | 8,519        | 7,270        | 1,848        | 5,618        | 122,141       | 3,047        | 3,372        | 17,180           | 7,971            | 4,488           |
| N tested                 | NR         | 620,962       | 1,289      | 835,797       | 29,506       | 39,877       | 3,719      | 501,106       | 6,151,004        | 464,495            | 18,053       | 99,112       | 53,581       | 60,588       | 171,81        | NR           | 4,908        | NR               | NR               | NR              |
| Tested positive, n (%)   | NR         | 82,917 (72.6) | NR         | 57,381 (44.3) | NR           | 902 (27.1)   | 520 (78.3) | 31,293 (56.3) | NR               | NR                 | 5,625 (66.0) | NR           | 1,777 (96.2) | 3,911 (69.6) | 38,657 (31.6) | NR           | 1,813 (53.8) | NR               | NR               | NR              |
| Follow up, n (%)         |            |               |            |               |              |              |            |               |                  |                    |              |              |              |              |               |              |              |                  |                  |                 |
| Full 30-day follow up    | 159 (42.7) | 27,286 (23.9) | 59 (30.4)  | 71,267 (55.0) | 915 (15.3)   | 2,352 (70.7) | 460 (69.3) | 43,575 (78.4) | 1,818,389 (70.5) | 15,686 (16.7)      | 1,680 (19.7) | 6,758 (93.0) | 979 (53.0)   | 2,733 (48.6) | 80,532 (65.9) | 2,417 (79.3) | 2,403 (71.3) | 8,047 (46.8)     | 4,792 (60.1)     | 3,358 (74.8)    |
| < 30-day follow up       | 213 (57.3) | 86,887 (76.1) | 135 (69.6) | 58,245 (45.0) | 5,047 (84.7) | 976 (29.3)   | 204 (30.7) | 11,978 (21.6) | 760,274 (29.5)   | 78,420 (83.3)      | 6,839 (80.3) | 499 (6.9)    | 869 (47.0)   | 2,885 (51.4) | 41,609 (34.1) | 630 (20.7)   | 969 (28.7)   | 9,133 (53.2)     | 3,179 (39.9)     | 1,130 (25.2)    |
| Conditions, n (%)        |            |               |            |               |              |              |            |               |                  |                    |              |              |              |              |               |              |              |                  |                  |                 |
| Type 2 Diabetes Mellitus | 105 (28.2) | 14,900 (13.1) | 85 (43.8)  | 24,248 (18.7) | 2,309 (38.7) | 519 (15.6)   | 167 (25.2) | 18,939 (34.1) | 715,513 (27.7)   | 26,859 (28.5)      | 1,903 (22.3) | 1,240 (17.1) | 322 (17.4)   | 562 (10.0)   | 9,916 (8.1)   | 483 (15.9)   | 515 (15.3)   | 1,212 (7.1)      | 1,027 (12.9)     | 437 (9.7)       |
| Hypertension             | 150 (40.3) | 25,405 (22.3) | 156 (80.4) | 50,160 (38.7) | 3,708 (62.2) | 1,246 (37.4) | 286 (43.1) | 34,093 (61.4) | 1,245,436 (48.3) | 46,110 (49.0)      | 3,672 (43.1) | 2,461 (33.9) | 624 (33.8)   | 1,000 (17.8) | 21,289 (17.4) | 676 (22.2)   | 756 (22.4)   | 3,260 (19.0)     | 2,418 (30.3)     | 1,618 (36.1)    |
| Heart disease            | 102 (27.4) | 14,469 (12.7) | 122 (62.9) | 36,362 (28.1) | 3,199 (53.7) | 923 (27.7)   | 220 (33.1) | 24,542 (44.2) | 926,008 (35.9)   | 26,462 (28.1)      | 3,068 (36.0) | 1,734 (23.9) | 372 (20.1)   | 716 (12.7)   | 17,724 (14.5) | 460 (15.1)   | 695 (20.6)   | 1,152 (6.7)      | 1,864 (23.4)     | 993 (22.1)      |
| Prior cancer             | 28 (7.5)   | 4,857 (4.3)   | 74 (38.1)  | 17,630 (13.6) | 1,321 (22.2) | 821 (24.7)   | 100 (15.1) | 10,760 (19.4) | 315,523 (12.2)   | 9,262 (9.8)        | 1,433 (16.8) | 806 (11.1)   | 153 (8.3)    | 419 (7.5)    | 8,854 (7.2)   | 257 (8.4)    | 285 (8.5)    | 658 (3.8)        | 619 (7.8)        | 528 (11.8)      |
| Hepatitis C              | NR         | 506 (0.4)     | 9 (4.6)    | 1,307 (1.0)   | 87 (1.5)     | 60 (1.8)     | 35 (5.3)   | 3,065 (5.5)   | 39,822 (1.5)     | 1,693 (1.8)        | 140 (1.6)    | 88 (1.2)     | 52 (2.8)     | 82 (1.5)     | 645 (0.5)     | NR           | NR           | 40 (0.2)         | 31 (0.4)         | 52 (1.2)        |
| Obesity                  | 27 (7.3)   | 12,249 (10.7) | 69 (35.6)  | 65,750 (50.8) | 2,145 (36.0) | 1,157 (34.8) | 283 (42.6) | 25,030 (45.1) | 734,604 (28.5)   | 23,941 (25.4)      | 3,446 (40.5) | 2,920 (40.2) | 198 (10.7)   | 886 (15.8)   | 36,439 (29.8) | 616 (20.2)   | 1,379 (40.9) | 2,073 (12.1)     | 1,277 (16.0)     | 662 (14.8)      |

# Unraveling COVID-19: a large-scale characterization of 4.5 million COVID-19 cases using CHARYBDIS

|                           |               |                  |              |                  |                 |               |               |                  |                   |                  |                 |                 |               |                 |                  |               |               |                 |                 |               |
|---------------------------|---------------|------------------|--------------|------------------|-----------------|---------------|---------------|------------------|-------------------|------------------|-----------------|-----------------|---------------|-----------------|------------------|---------------|---------------|-----------------|-----------------|---------------|
| Dementia                  | 6<br>(1.6)    | 2,900 (2.5)      | 27<br>(13.9) | 4,754<br>(3.7)   | 755<br>(12.7)   | 36 (1.1)      | 22<br>(3.3)   | 3,977<br>(7.2)   | 216,248<br>(8.4)  | 5,257<br>(5.6)   | 473<br>(5.6)    | 212<br>(2.9)    | 103<br>(5.6)  | 89<br>(1.6)     | 6,003<br>(4.9)   | 57<br>(1.9)   | 300<br>(8.9)  | 50<br>(0.3)     | 285 (3.6)       | 74<br>(1.6)   |
| Autoimmune condition      | 48<br>(12.9)  | 5,884 (5.2)      | 28<br>(14.4) | 12,897<br>(10.0) | 1,334<br>(22.4) | 406<br>(12.2) | 130<br>(19.6) | 10,087<br>(18.2) | 431,640<br>(16.7) | 7,856<br>(8.3)   | 1,363<br>(16.0) | 696<br>(9.6)    | 128<br>(6.9)  | 388<br>(6.9)    | 8,238<br>(6.7)   | 472<br>(15.5) | 382<br>(11.3) | 1,398<br>(8.1)  | 1,139<br>(14.3) | 626<br>(13.9) |
| COPD without asthma       | NR            | 6,500 (5.7)      | 50<br>(25.8) | 11,056<br>(8.5)  | 1,226<br>(20.6) | 218<br>(6.6)  | 78<br>(11.7)  | 12,610<br>(22.7) | 294,741<br>(11.4) | 9,566<br>(10.2)  | 770<br>(9.0)    | 692<br>(9.5)    | 99<br>(5.4)   | 226<br>(4.0)    | 15,803<br>(12.9) | 200<br>(6.6)  | 261<br>(7.7)  | 648<br>(3.8)    | 816<br>(10.2)   | 340<br>(7.6)  |
| Asthma without COPD       | 16<br>(4.3)   | 8,477 (7.4)      | 25<br>(12.9) | 20,049<br>(15.5) | 955<br>(16.0)   | 501<br>(15.1) | 104<br>(15.7) | 6,256<br>(11.3)  | 435,591<br>(16.9) | 10,476<br>(11.1) | 1,338<br>(15.7) | 1,035<br>(14.2) | 159<br>(8.6)  | 533<br>(9.5)    | 7,542<br>(6.2)   | 311<br>(10.2) | 488<br>(14.5) | 2,157<br>(12.6) | 1,013<br>(12.7) | 413<br>(9.2)  |
| Pregnant women            | NR            | 913 (0.8)        | NR           | 3,191<br>(2.5)   | 82 (1.4)        | 31 (0.9)      | 13<br>(2.0)   | 83 (0.1)         | 36,955 (1.4)      | 1,850<br>(2.0)   | 317<br>(3.7)    | 168<br>(2.3)    | 28<br>(1.5)   | 110<br>(2.0)    | 660<br>(0.5)     | 28<br>(0.9)   | 8<br>(0.2)    | 168<br>(1.0)    | 30 (0.4)        | 61<br>(1.4)   |
| Flu-like symptom episodes | 38<br>(10.2)  | 26,051<br>(22.8) | 85<br>(43.8) | 39,731<br>(30.7) | 4,167<br>(69.9) | 625<br>(18.8) | 337<br>(50.8) | 11,450<br>(20.6) | 729,102<br>(28.3) | 29,535<br>(31.4) | 2,514<br>(29.5) | 2,590<br>(35.6) | 689<br>(37.3) | 2,104<br>(37.5) | 25,159<br>(20.6) | 339<br>(11.1) | 120<br>(3.6)  | 2,995<br>(17.4) | 437 (5.5)       | 120<br>(2.7)  |
| CKD broad                 | 151<br>(40.6) | 5,714 (5.0)      | 86<br>(44.3) | 16,497<br>(12.7) | 1,608<br>(27.0) | 379<br>(11.4) | NR            | 10,194<br>(18.3) | 361,527<br>(14.0) | 12,934<br>(13.7) | 1,143<br>(13.4) | 684<br>(9.4)    | 182<br>(9.8)  | 260<br>(4.6)    | 8,135<br>(6.7)   | 193<br>(6.3)  | 463<br>(13.7) | 187<br>(1.1)    | 528 (6.6)       | 185<br>(4.1)  |
| ESRD                      | 150<br>(40.3) | 1,363 (1.2)      | 23<br>(11.9) | 2,811<br>(2.2)   | 332<br>(5.6)    | 119<br>(3.6)  | NR            | 3,259<br>(5.9)   | 95,502 (3.7)      | 4,412<br>(4.7)   | 586<br>(6.9)    | 160<br>(2.2)    | 45<br>(2.4)   | 51<br>(0.9)     | 8 (0.0)          | NR            | 15<br>(0.4)   | NR              | 27 (0.3)        | NR            |
| HIV/AIDS                  | NR            | 546 (0.5)        | NR           | 685<br>(0.5)     | 52 (0.9)        | 20 (0.6)      | NR            | 805<br>(1.4)     | 24,401 (0.9)      | 1,078<br>(1.1)   | 154<br>(1.8)    | 53<br>(0.7)     | 39<br>(2.1)   | 39<br>(0.7)     | 288<br>(0.2)     | NR            | NR            | 78<br>(0.5)     | 15 (0.2)        | 19<br>(0.4)   |

Abbreviations: Clinical Practice Research Datalink (CPRD), Colorado University Anschuz Medical Campus Health Data Compass (CU-AMC HDC), Columbia University Irving Medical Center (CUIMC), Daegu Catholic University Medical Center (DCMC) Health Insurance Review & Assessment Service (HIRA), Hospital del Mar (HMAR), Integrated Primary Care Information (IPCI), IQVIA Disease Analyser Germany (DA Germany), IQVIA Longitudinal Patient Data France (LPD France), IQVIA Longitudinal Patient Data Italy (LPD Italy), Nanfang Hospital COVID-19 Research Database (NFHCRD) Oregon Health & Science University (OHSU) Information System for Research in Primary Care (SIDIAP), Information System for Research in Primary Care – Hospitalization Linked Data (SIDIAP-H), STAnford medicine Research data Repository (STARR-OMOP), Tufts MC Research Data Warehouse (TRDW), UW Medicine COVID Research Dataset (UWM-CRD) Department of Veterans Affairs (VA-OMOP), NR: Not Reported by Data Partner. COPD: Chronic obstructive pulmonary disease; CKD: Chronic kidney disease; ESRD: End-stage renal disease; HIV/AIDS: Human immunovirus deficiency/Acquired immunodeficiency syndrome.

Supplementary Table 5. Distributions of persons hospitalized with COVID-19 diagnosis or SARS-CoV-2 positive test in each cohort (1 year observation period required)

|                                          | ASIA  | UNITED STATES |               |           |            |            |              |                  |                    |              |            |            |            | EUROPE        |            |
|------------------------------------------|-------|---------------|---------------|-----------|------------|------------|--------------|------------------|--------------------|--------------|------------|------------|------------|---------------|------------|
|                                          | HIRA  | HealthVerity  | OPTUM-EHR     | OPTUM-SES | STARR-OMOP | TRDW       | VA-OMOP      | IQVIA OpenClaims | IQVIA Hospital CDM | CUIMC        | CU-AMC-HDC | UWM-CRD    | OHSU       | SIDIAP        | HMAR       |
| N                                        | 7,599 | 7,581         | 22,024        | 3,370     | 615        | 186        | 10,471       | 502,933          | 33,954             | 2,600        | 1,434      | 534        | 466        | 18,202        | 2,011      |
| Hospitalized with a positive test, n (%) | NR    | 4,221 (55.7)  | 10,304 (46.8) | NR        | 86 (14.0)  | 140 (75.3) | 8,352 (79.8) | NR               | NR                 | 2,344 (90.2) | NR         | 494 (92.5) | 248 (53.2) | 13,561 (74.5) | 609 (30.3) |
| Follow up, n (%)                         |       |               |               |           |            |            |              |                  |                    |              |            |            |            |               |            |

# Unraveling COVID-19: a large-scale characterization of 4.5 million COVID-19 cases using CHARYBDIS

|                          |              |              |               |              |            |            |              |                |               |              |              |            |            |               |              |
|--------------------------|--------------|--------------|---------------|--------------|------------|------------|--------------|----------------|---------------|--------------|--------------|------------|------------|---------------|--------------|
| Full 30-day follow up    | 7,359 (96.8) | 4,294 (56.6) | 14,744 (66.9) | 627 (18.6)   | 556 (90.4) | NR         | 8,353 (79.8) | 398,650 (79.3) | 8,316 (24.5)  | 735 (28.3)   | 1,385 (96.6) | 319 (59.7) | 365 (78.3) | 12,170 (66.9) | 1,040 (51.7) |
| < 30-day follow up       | 240 (3.2)    | 3,287 (43.4) | 7,280 (33.1)  | 2,743 (81.4) | 59 (9.6)   | NR         | 2,115 (20.2) | 104,283 (20.7) | 25,638 (75.5) | 1,865 (71.7) | 49 (3.4)     | 215 (40.3) | 101 (21.7) | 6,032 (33.1)  | 971 (48.3)   |
| Conditions, n (%)        |              |              |               |              |            |            |              |                |               |              |              |            |            |               |              |
| Type 2 Diabetes Mellitus | 1,760 (23.2) | 2,879 (38.0) | 7,977 (36.2)  | 1,581 (46.9) | 138 (22.4) | 77 (41.4)  | 5,773 (55.1) | 250,468 (49.8) | 13,990 (41.2) | 1,065 (41.0) | 556 (38.8)   | 174 (32.6) | 150 (32.2) | 3,286 (18.1)  | 268 (13.3)   |
| Hypertension             | 1,943 (25.6) | 4,512 (59.5) | 13,993 (63.5) | 2,498 (74.1) | 342 (55.6) | 116 (62.4) | 8,996 (85.9) | 384,508 (76.5) | 22,219 (65.4) | 1,708 (65.7) | 904 (63.0)   | 324 (60.7) | 246 (52.8) | 5,636 (31.0)  | 594 (29.5)   |
| Heart disease            | 1,271 (16.7) | 3,414 (45.0) | 11,300 (51.3) | 2,238 (66.4) | 264 (42.9) | 100 (53.8) | 7,339 (70.1) | 314,973 (62.6) | 13,803 (40.7) | 1,418 (54.5) | 688 (48.0)   | 233 (43.6) | 215 (46.1) | 5,142 (28.2)  | 335 (16.7)   |
| Prior history of cancer  | 410 (5.4)    | 797 (10.5)   | 4,451 (20.2)  | 939 (27.9)   | 244 (39.7) | 46 (24.7)  | 3,383 (32.3) | 105,931 (21.1) | 4,706 (13.9)  | 561 (21.6)   | 265 (18.5)   | 75 (14.0)  | 127 (27.3) | 2,610 (14.3)  | 169 (8.4)    |
| Hepatitis C              | 61 (0.8)     | 99 (1.3)     | 418 (1.9)     | 59 (1.8)     | 15 (2.4)   | 13 (7.0)   | 1,032 (9.9)  | 14,294 (2.8)   | 944 (2.8)     | 78 (3.0)     | 35 (2.4)     | 25 (4.7)   | 33 (7.1)   | 133 (0.7)     | 35 (1.7)     |
| Obesity                  | 16 (0.2)     | 1,633 (21.5) | 13,279 (60.3) | 1,397 (41.5) | 274 (44.6) | 94 (50.5)  | 5,656 (54.0) | 189,307 (37.6) | 9,651 (28.4)  | 1,408 (54.2) | 830 (57.9)   | 109 (20.4) | 136 (29.2) | 8,405 (46.2)  | 251 (12.5)   |
| Dementia                 | 436 (5.7)    | 1,087 (14.3) | 2,039 (9.3)   | 563 (16.7)   | 16 (2.6)   | 17 (9.1)   | 2,055 (19.6) | 80,728 (16.1)  | 3,155 (9.3)   | 364 (14.0)   | 123 (8.6)    | 84 (15.7)  | 22 (4.7)   | 1,099 (6.0)   | 71 (3.5)     |
| Autoimmune condition     | 813 (10.7)   | 946 (12.5)   | 3,112 (14.1)  | 842 (25.0)   | 85 (13.8)  | 54 (29.0)  | 3,152 (30.1) | 136,193 (27.1) | 3,807 (11.2)  | 557 (21.4)   | 209 (14.6)   | 61 (11.4)  | 72 (15.5)  | 1,702 (9.4)   | 81 (4.0)     |
| COPD without asthma      | 145 (1.9)    | 1,649 (21.8) | 4,504 (20.5)  | 900 (26.7)   | 90 (14.6)  | 43 (23.1)  | 4,611 (44.0) | 117,304 (23.3) | 5,999 (17.7)  | 447 (17.2)   | 299 (20.9)   | 68 (12.7)  | 76 (16.3)  | 4,843 (26.6)  | 134 (6.7)    |
| Asthma without COPD      | 1,560 (20.5) | 700 (9.2)    | 3,374 (15.3)  | 529 (15.7)   | 119 (19.3) | 37 (19.9)  | 1,148 (11.0) | 81,396 (16.2)  | 3,346 (9.9)   | 479 (18.4)   | 221 (15.4)   | 52 (9.7)   | 89 (19.1)  | 953 (5.2)     | 80 (4.0)     |
| Pregnant women           | 121 (1.6)    | 79 (1.0)     | 1,121 (5.1)   | 18 (0.5)     | 12 (2.0)   | NR         | NR           | 11,126 (2.2)   | 1,058 (3.1)   | 121 (4.7)    | 80 (5.6)     | 18 (3.4)   | 44 (9.4)   | 101 (0.6)     | 13 (0.6)     |
| CKD                      | 421 (5.5)    | 1,870 (24.7) | 5,915 (26.9)  | 1,189 (35.3) | 142 (23.1) | NR         | 3,937 (37.6) | 162,943 (32.4) | 7,718 (22.7)  | 661 (25.4)   | 344 (24.0)   | 131 (24.5) | 100 (21.5) | 2,658 (14.6)  | 178 (8.9)    |
| ERSD                     | 30 (0.4)     | 644 (8.5)    | 1,376 (6.2)   | 271 (8.0)    | 31 (5.0)   | NR         | 1,513 (14.4) | 53,074 (10.6)  | 3,053 (9.0)   | 359 (13.8)   | 96 (6.7)     | 39 (7.3)   | 28 (6.0)   | NR            | 88 (4.4)     |
| HIVAIDS                  | NR           | 55 (0.7)     | 190 (0.9)     | 21 (0.6)     | NR         | NR         | 235 (2.2)    | 6,893 (1.4)    | 456 (1.3)     | 67 (2.6)     | 12 (0.8)     | NR         | NR         | 47 (0.3)      | 13 (0.6)     |

Abbreviations: Clinical Practice Research Datalink (CPRD), Colorado University Anschutz Medical Campus Health Data Compass (CU-AMC HDC), Columbia University Irving Medical Center (CUIMC), Daegu Catholic University Medical Center (DCMC) Health Insurance Review & Assessment Service (HIRA), Hospital del Mar (HMAR), Integrated Primary Care Information (IPCI), IQVIA Disease Analyser Germany (DA Germany), IQVIA Longitudinal Patient Data France (LPD France), IQVIA Longitudinal Patient Data Italy (LPD Italy), Nanfang Hospital COVID-19 Research Database (NFHCRD) Oregon Health & Science University (OHSU) Information System for Research in Primary Care (SIDIAP), Information System for Research in Primary Care – Hospitalization Linked Data (SIDIAP-H), STAnford medicine Research data Repository (STARR-OMOP), Tufts MC Research Data Warehouse (TRDW), UW Medicine COVID Research Dataset (UWM-CRD) Department of Veterans Affairs (VA-OMOP), NR: Not Reported by Data Partner. COPD: Chronic obstructive pulmonary disease; CKD: Chronic kidney disease; ESRD: End-stage renal disease; HIV/AIDS: Human immunovirus deficiency/Acquired immunodeficiency syndrome.

# Unraveling COVID-19: a large-scale characterization of 4.5 million COVID-19 cases using CHARYBDIS

Supplementary Table 6. Symptoms at index date and 30-day outcomes in persons diagnosed and/or hospitalized with a COVID-19 diagnosis or SARS-CoV-2 positive test in each cohort across the OHDSI COVID-19 Network\*

|                                           | ASIA |      |        | UNITED STATES |         |           |           |            |      |         |                  |                    |       |         |      | EUROPE        |        |      |      |      |                  |                  |                 |
|-------------------------------------------|------|------|--------|---------------|---------|-----------|-----------|------------|------|---------|------------------|--------------------|-------|---------|------|---------------|--------|------|------|------|------------------|------------------|-----------------|
|                                           | HIRA | DCMC | NFHCRD | HealthVerity  | Premier | OPTUM-EHR | OPTUM-SES | STARR-OMOP | TRDW | VA-OMOP | IQVIA OpenClaims | IQVIA Hospital CDM | CUIMC | UWM-CRD | OHSU | HM-Hospitales | SIDIAP | HMAR | IPCI | CPRD | IQVIA LPD France | IQVIA DA Germany | IQVIA LPD Italy |
| Diagnosed                                 |      |      |        |               |         |           |           |            |      |         |                  |                    |       |         |      |               |        |      |      |      |                  |                  |                 |
| At index symptoms, %                      |      |      |        |               |         |           |           |            |      |         |                  |                    |       |         |      |               |        |      |      |      |                  |                  |                 |
| Dyspnea                                   | NR   | 0.9  | NR     | 1.8           | 17.1    | 7.6       | 21.5      | 3.3        | 14.6 | 4.7     | 7.4              | 6.3                | 11.8  | 4.5     | 4.7  | NR            | 0.9    | NR   | 0.9  | 0.9  | 1.2              | 0.6              | NR              |
| Cough                                     | NR   | NR   | NR     | 6.4           | 16.4    | 9         | 22.5      | 6.6        | 32.2 | 7.3     | 8.5              | 12.4               | 7.1   | 6.5     | 13.3 | NR            | 2.6    | NR   | 1.8  | 0.7  | 6.2              | 1.7              | 1.3             |
| Fever                                     | NR   | 6.1  | NR     | 4.7           | 16.7    | 6.8       | 21        | 5.2        | 23   | 4.6     | 6.7              | 10.3               | 5     | 5.3     | 15.6 | NR            | 2.2    | NR   | 1.4  | 0.2  | 4.9              | 1.5              | NR              |
| Malaise or fatigue                        | NR   | NR   | NR     | 1.9           | 4.5     | 2.2       | 5.1       | 1.8        | 1.3  | 1.5     | 2.1              | 2.9                | 1.3   | 1.6     | 2.4  | NR            | 0.2    | NR   | 0.4  | 0.2  | 2.5              | 0.3              | 0.2             |
| Myalgia                                   | NR   | NR   | NR     | 0.4           | 2.2     | 1.2       | 1.7       | 0.9        | 4.8  | 1       | 0.8              | 2.5                | 0.2   | 0.9     | 12   | NR            | 0      | NR   | NR   | 0.2  | 0.3              | 0.1              | NR              |
| Anosmia OR Hyposmia OR Dysgeusia          | NR   | NR   | NR     | 0.5           | 0.6     | 0.9       | 0.4       | 0.3        | NR   | 0.5     | 0.8              | 1.9                | 0.3   | NR      | 8.1  | NR            | 0      | NR   | NR   | NR   | 1.8              | 0.3              | 0.1             |
| 30-day outcomes, %                        |      |      |        |               |         |           |           |            |      |         |                  |                    |       |         |      |               |        |      |      |      |                  |                  |                 |
| Hospitalization episodes                  | NR   | 8.2  | 59.3   | 3.4           | 54.3    | 17.7      | 43.9      | 15.1       | 19.8 | 16.6    | 18.6             | 15.5               | 28.7  | 17.5    | 5.3  | NR            | 13.1   | NR   | 1.3  | NR   | NR               | NR               | NR              |
| Intensive services during hospitalization | NR   | NR   | 1.2    | 0.2           | 12.2    | 2.1       | 5.9       | 1.3        | 6.5  | 2.9     | 1.6              | 3.3                | 0.6   | 2.7     | 0.5  | NR            | NR     | NR   | NR   | NR   | NR               | NR               | NR              |
| Death                                     | NR   | NR   | NR     | NR            | 10.6    | 0.9       | NR        | 0.3        | 2.6  | 3.6     | NR               | 5.8                | 6.3   | 3.3     | 0.5  | NR            | 4.3    | NR   | 5.3  | 14.1 | NR               | 0.1              | NR              |
| Hospitalized                              |      |      |        |               |         |           |           |            |      |         |                  |                    |       |         |      |               |        |      |      |      |                  |                  |                 |
| At index symptoms, %                      |      |      |        |               |         |           |           |            |      |         |                  |                    |       |         |      |               |        |      |      |      |                  |                  |                 |
| Dyspnea                                   | 8.8  | NR   | NR     | 11.8          | 16.6    | 23.8      | 34.7      | 7.3        | 6.4  | 13.9    | 14.4             | 14.7               | 32    | 23.2    | 8.9  | 0.3           | 2.4    | 0.8  | NR   | NR   | NR               | NR               | NR              |
| Cough                                     | 11.7 | NR   | NR     | 4.9           | 4.8     | 13.2      | 20.8      | 3.9        | 3.7  | 6       | 5                | 3.1                | 14    | 14.3    | 5.7  | 0.2           | 2.2    | 2.9  | NR   | NR   | NR               | NR               | NR              |
| Fever                                     | 5.2  | NR   | 3.6    | 7.3           | 9.4     | 13.2      | 23.7      | 6.9        | 7.1  | 6.5     | 7                | 6.9                | 9.9   | 17.6    | 9.6  | 12.2          | 3.1    | 2.9  | NR   | NR   | NR               | NR               | NR              |
| Malaise or fatigue                        | NR   | NR   | NR     | 2.7           | 4.4     | 5.2       | 6.2       | 6.7        | NR   | 2.4     | 2.3              | 1.9                | 3.3   | 5.6     | 3    | 0.7           | 0.3    | 1    | NR   | NR   | NR               | NR               | NR              |
| Myalgia                                   | 2.4  | NR   | NR     | 0.2           | 0.6     | 1.4       | 1.2       | 1.3        | NR   | 0.6     | 0.2              | 0.1                | NR    | 2.5     | NR   | NR            | 0      | 0.9  | NR   | NR   | NR               | NR               | NR              |
| Anosmia OR Hyposmia OR Dysgeusia          | 0.2  | NR   | NR     | 0.1           | 0.2     | 0.3       | 0.2       | NR         | NR   | 0.2     | 0.1              | 0                  | NR    | NR      | NR   | NR            | 0      | 2.7  | NR   | NR   | NR               | NR               | NR              |

# Unraveling COVID-19: a large-scale characterization of 4.5 million COVID-19 cases using CHARYBDIS

| 30-day outcomes, %                        |     |    |    |     |      |     |      |     |      |      |     |      |      |      |     |      |      |     |    |    |    |    |
|-------------------------------------------|-----|----|----|-----|------|-----|------|-----|------|------|-----|------|------|------|-----|------|------|-----|----|----|----|----|
| Intensive services during hospitalization | 1.7 | NR | 2  | 5.3 | 22.6 | 12  | 13.2 | 8.2 | 30.7 | 16.7 | 8.4 | 22.1 | 2.4  | 15.8 | 10  | 54.9 | NR   | 8.2 | NR | NR | NR | NR |
| Death                                     | 2.5 | NR | NR | NR  | 19   | 4.2 | NR   | 0.9 | 9.5  | 14.5 | NR  | 14.6 | 18.8 | 13.6 | 6.7 | 14.1 | 12.2 | 5.9 | NR | NR | NR | NR |

\*Proportions presented among diagnosed or hospitalized patients with a COVID-19 diagnosis or SARS-CoV-2 positive test by database (column percentage); - data not available; < values were below the minimum cell count required (5 individuals); no prior observation time was required.

\*\*Prevalent conditions at index date.

Abbreviations: Clinical Practice Research Datalink (CPRD), Colorado University Anschuz Medical Campus Health Data Compass (CU-AMC HDC), Columbia University Irving Medical Center (CUIMC), Daegu Catholic University Medical Center (DCMC) Health Insurance Review & Assessment Service (HIRA), Hospital del Mar (HMAR), Integrated Primary Care Information (IPCI), IQVIA Disease Analyser Germany (DA Germany), IQVIA Longitudinal Patient Data France (LPD France), IQVIA Longitudinal Patient Data Italy (LPD Italy), Nanfang Hospital COVID-19 Research Database (NFHCRD) Oregon Health & Science University (OHSU) Information System for Research in Primary Care (SIDIAP), Information System for Research in Primary Care – Hospitalization Linked Data (SIDIAP-H), STAnford medicine Research data Repository (STARR-OMOP), Tufts MC Research Data Warehouse (TRDW), UW Medicine COVID Research Dataset (UWM-CRD) Department of Veterans Affairs (VA-OMOP), NR: Not Reported by Data Partner. COPD: Chronic obstructive pulmonary disease; CKD: Chronic kidney disease; ESRD: End-stage renal disease; HIV/AIDS: Human immunovirus deficiency/Acquired immunodeficiency syndrome.
